# Supplementary material for: Synthesis, cholinesterase/MAO-A inhibition, antioxidant potential and detailed computational analysis of 3,5-difluorobenzenesulfonate-tagged ethoxyvanillin hydrazones
Source: Royal Society of Chemistry journal article supplement (doi:10.1039/d6ra01071g), 2026-05-08
Supplement: d6ra01071g1.pdf [file d6ra01071g1.pdf]

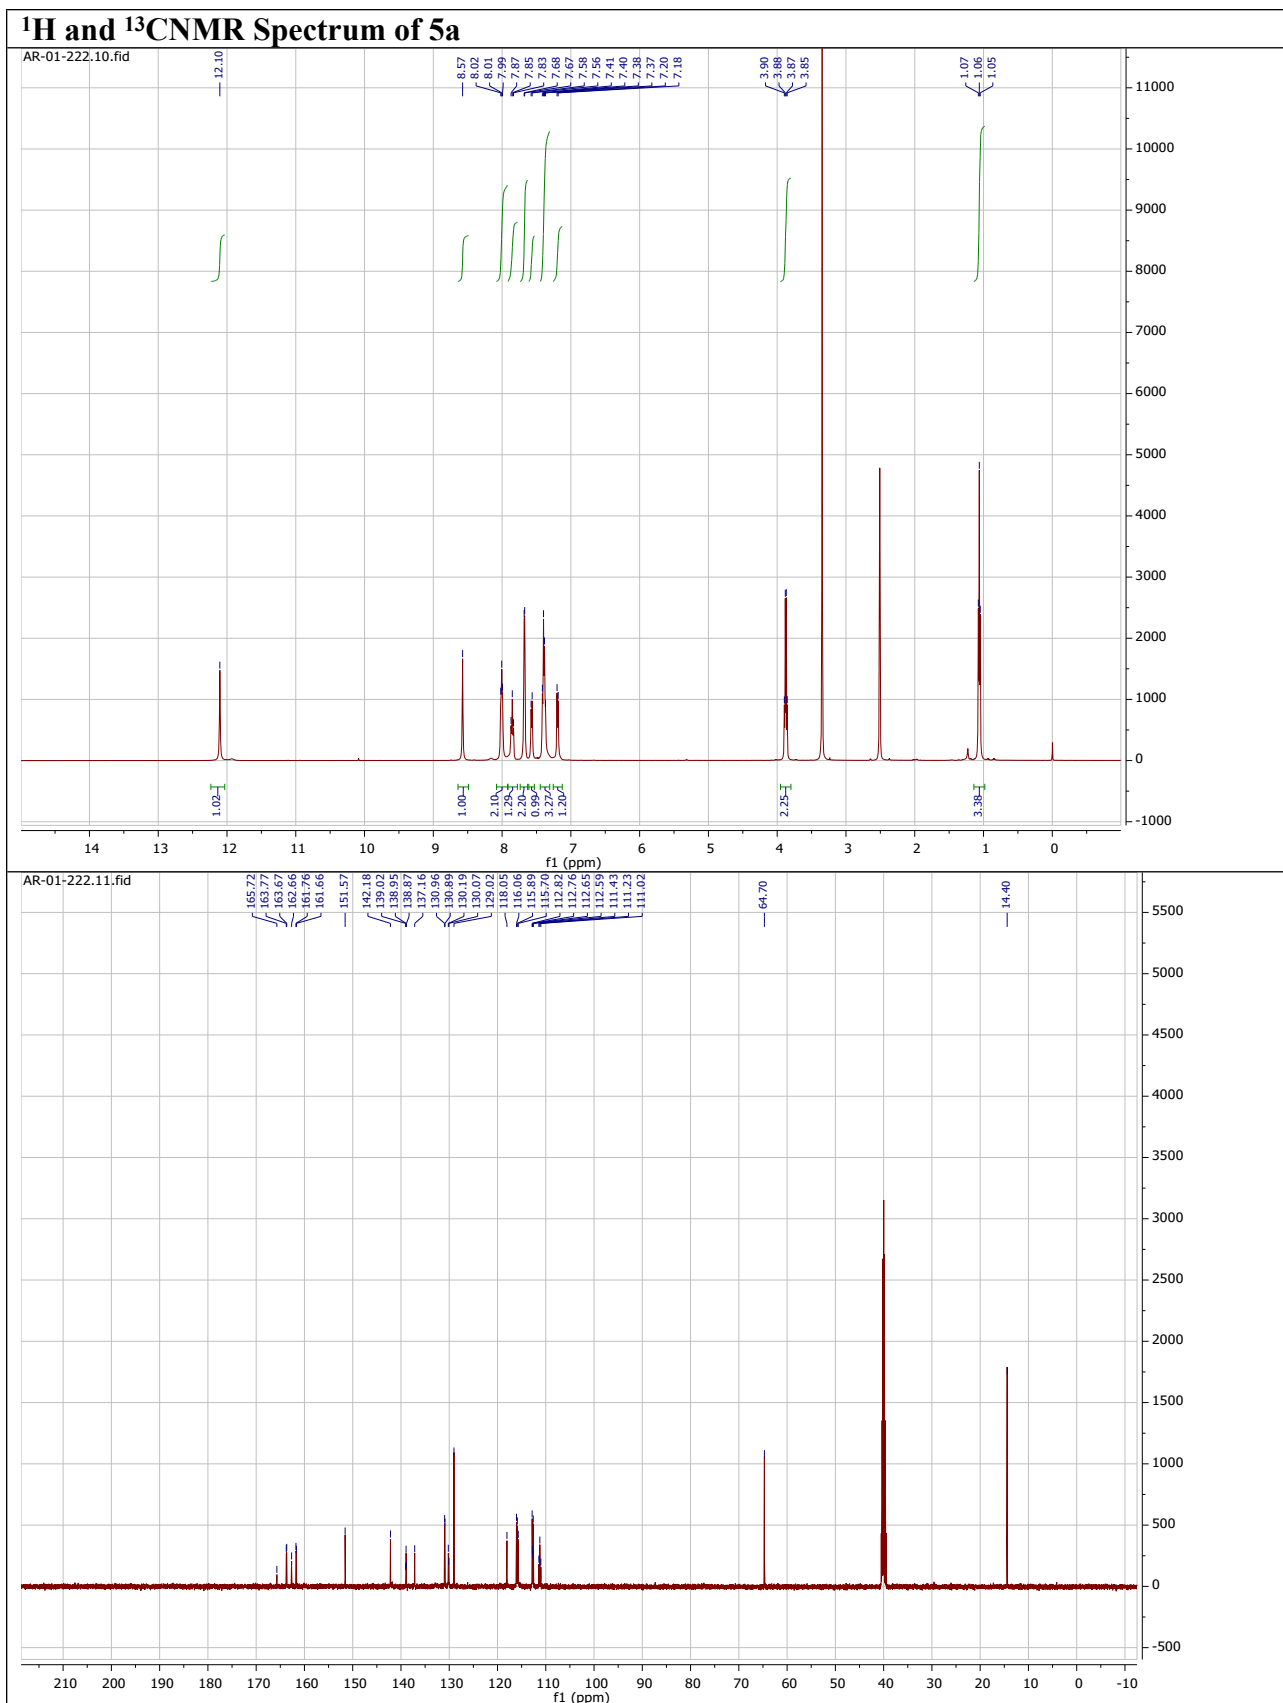

# <sup>1</sup>H and <sup>13</sup>CNMR Spectrum of 5b

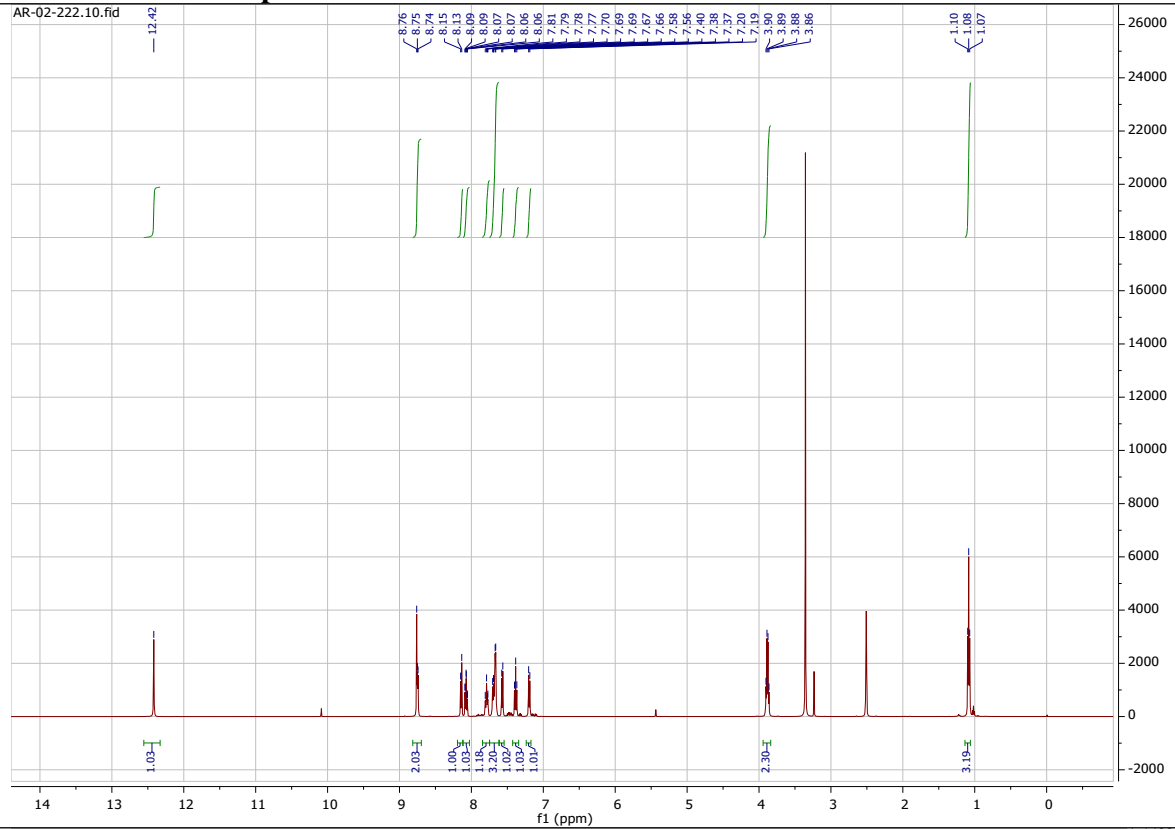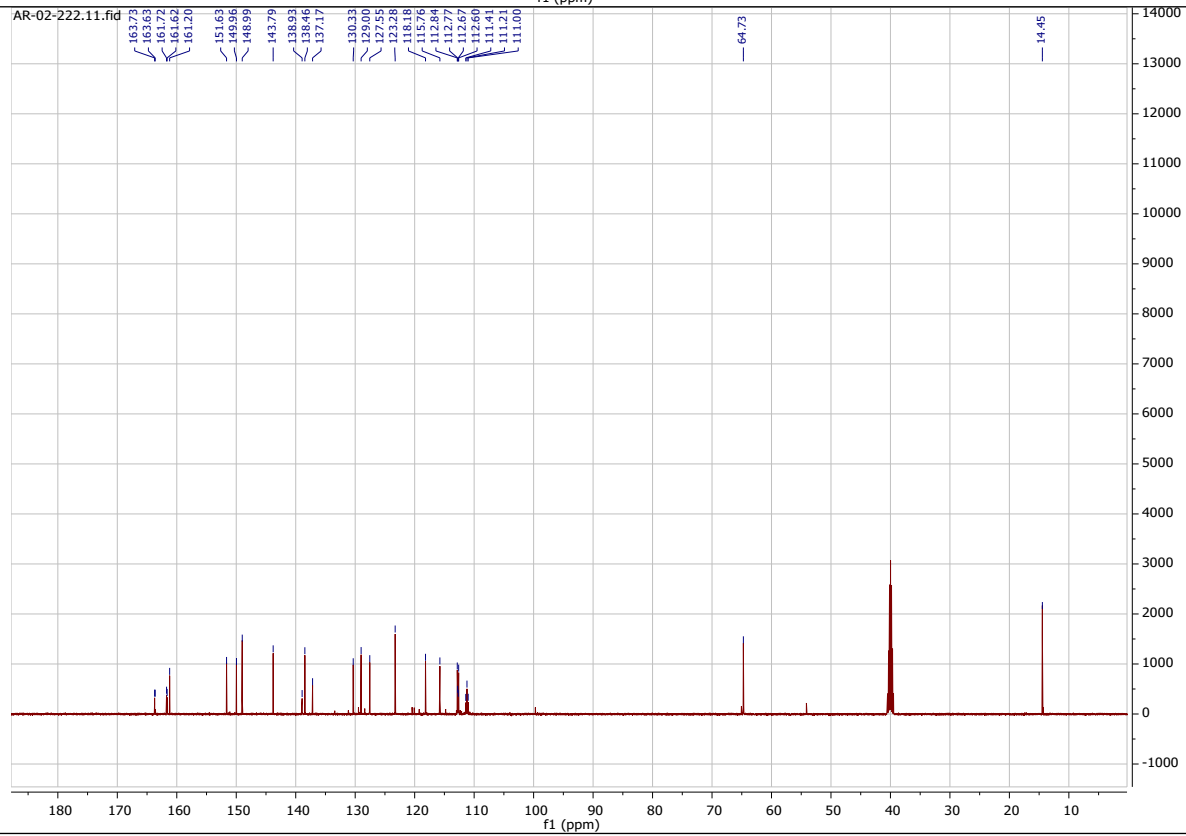

# <sup>1</sup>H and <sup>13</sup>C NMR Spectrum of 5c

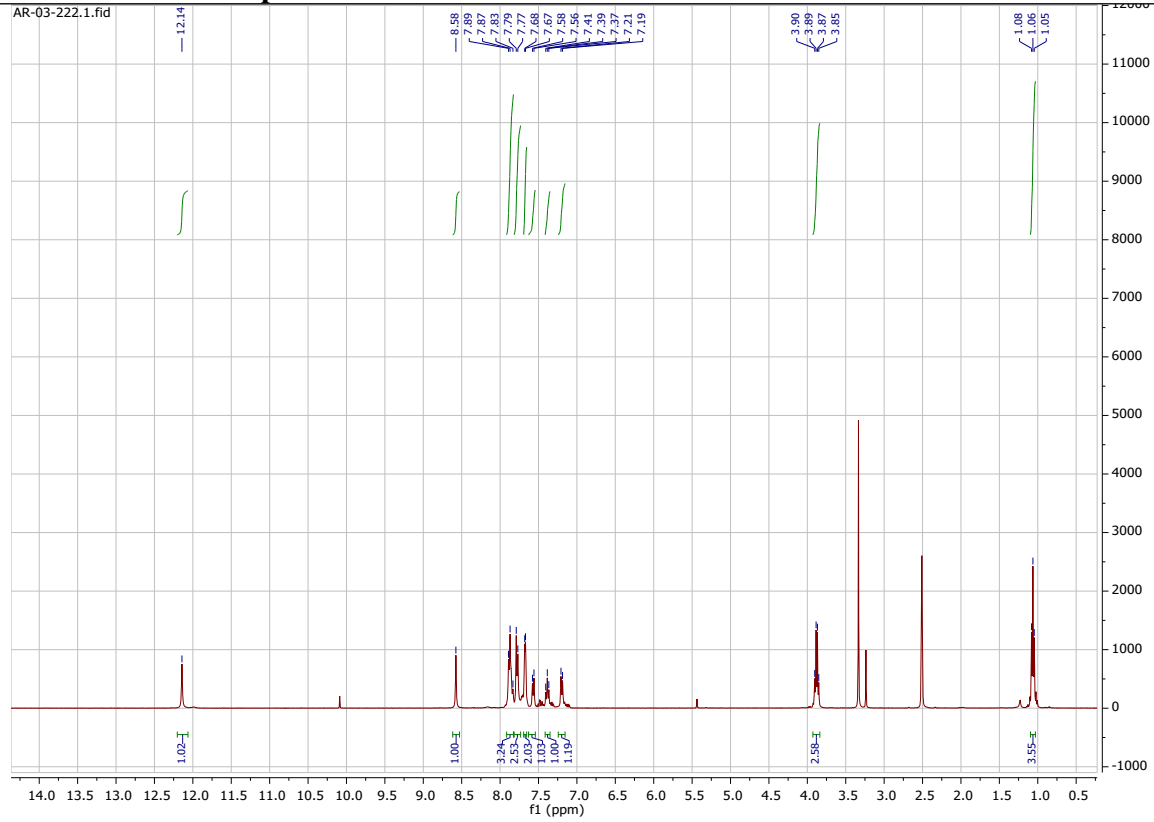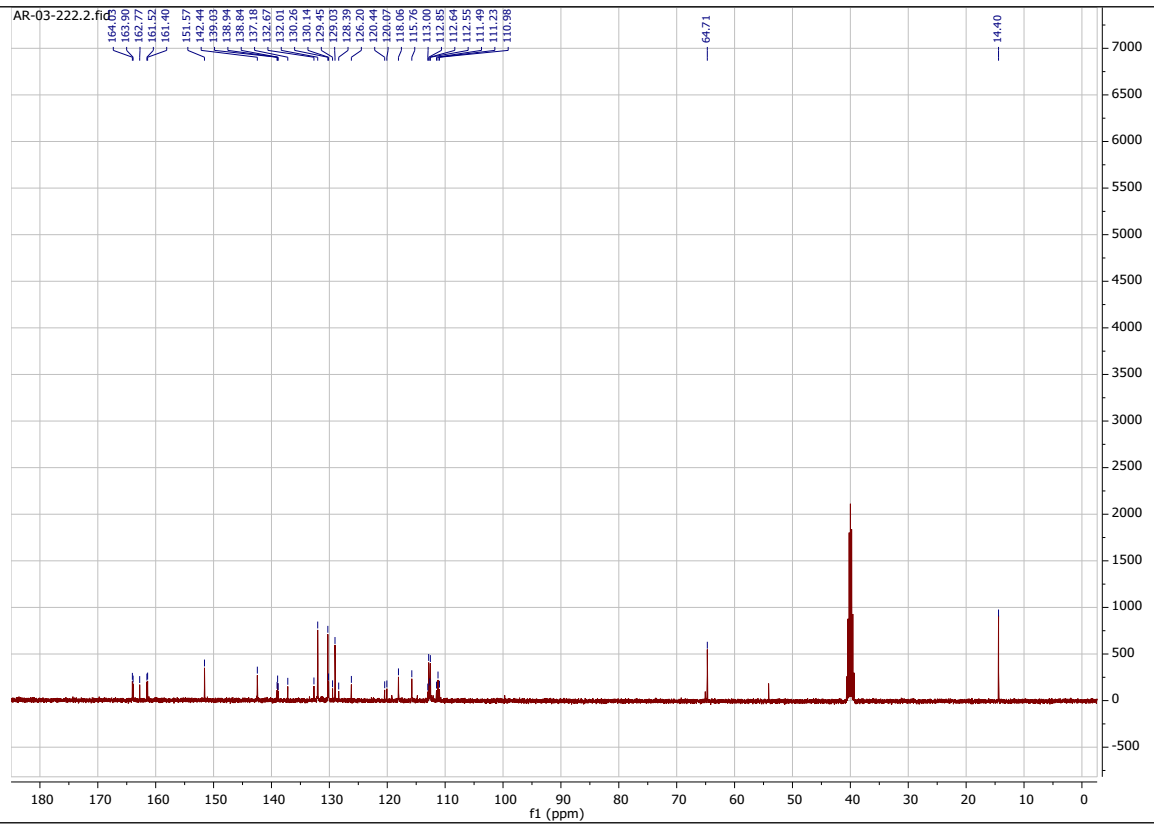

# <sup>1</sup>H and <sup>13</sup>CNMR Spectrum of 5d

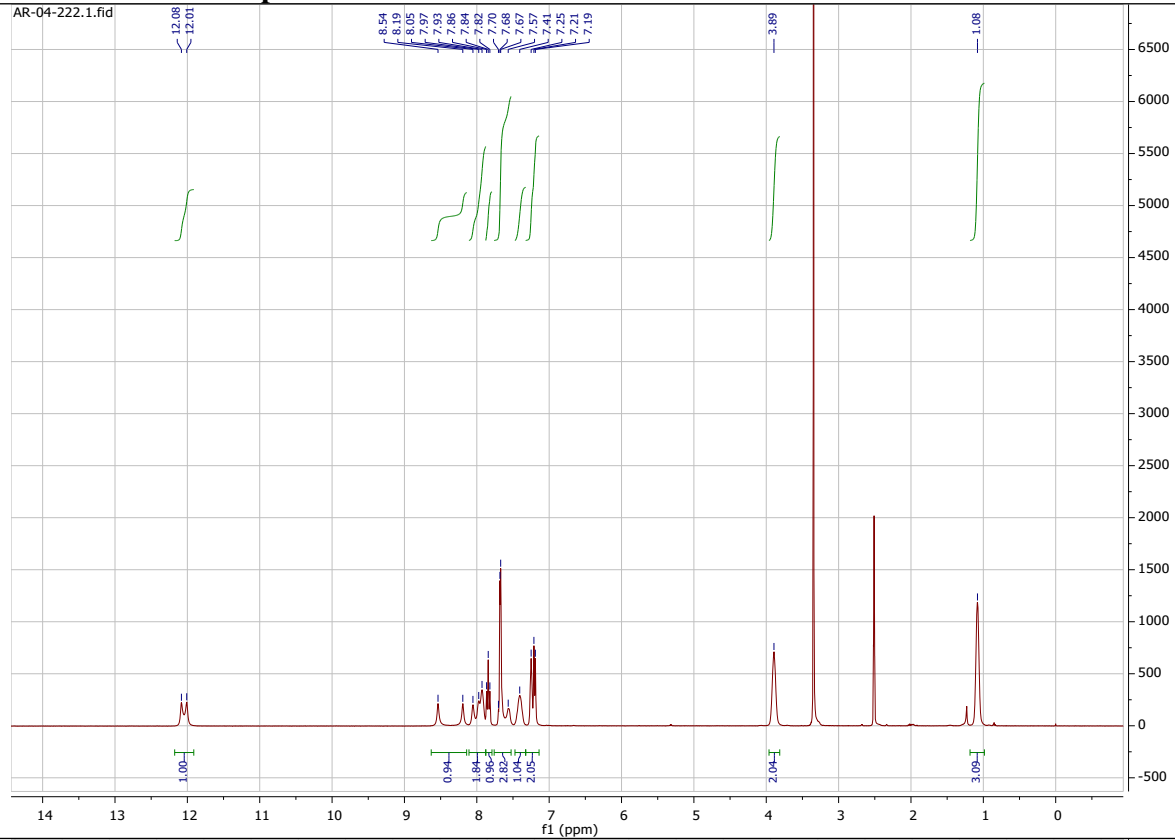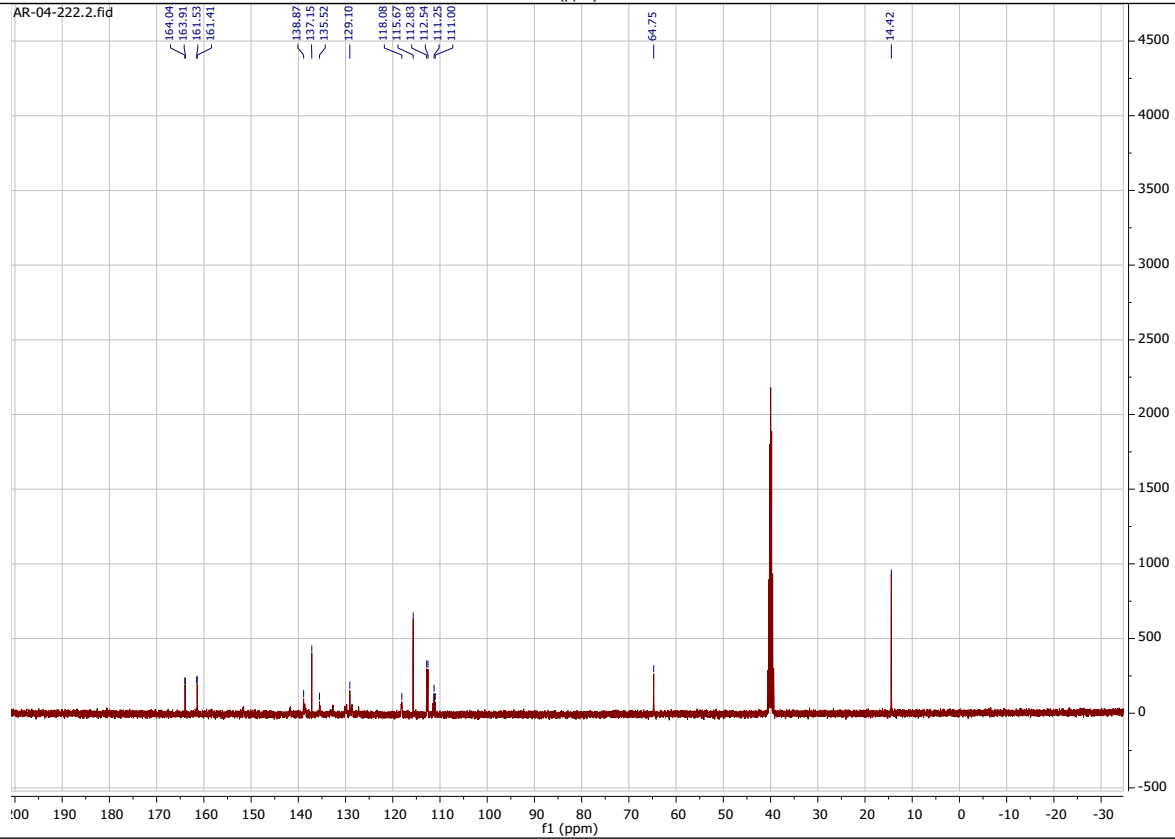

# <sup>1</sup>H and <sup>13</sup>C NMR Spectrum of 5e

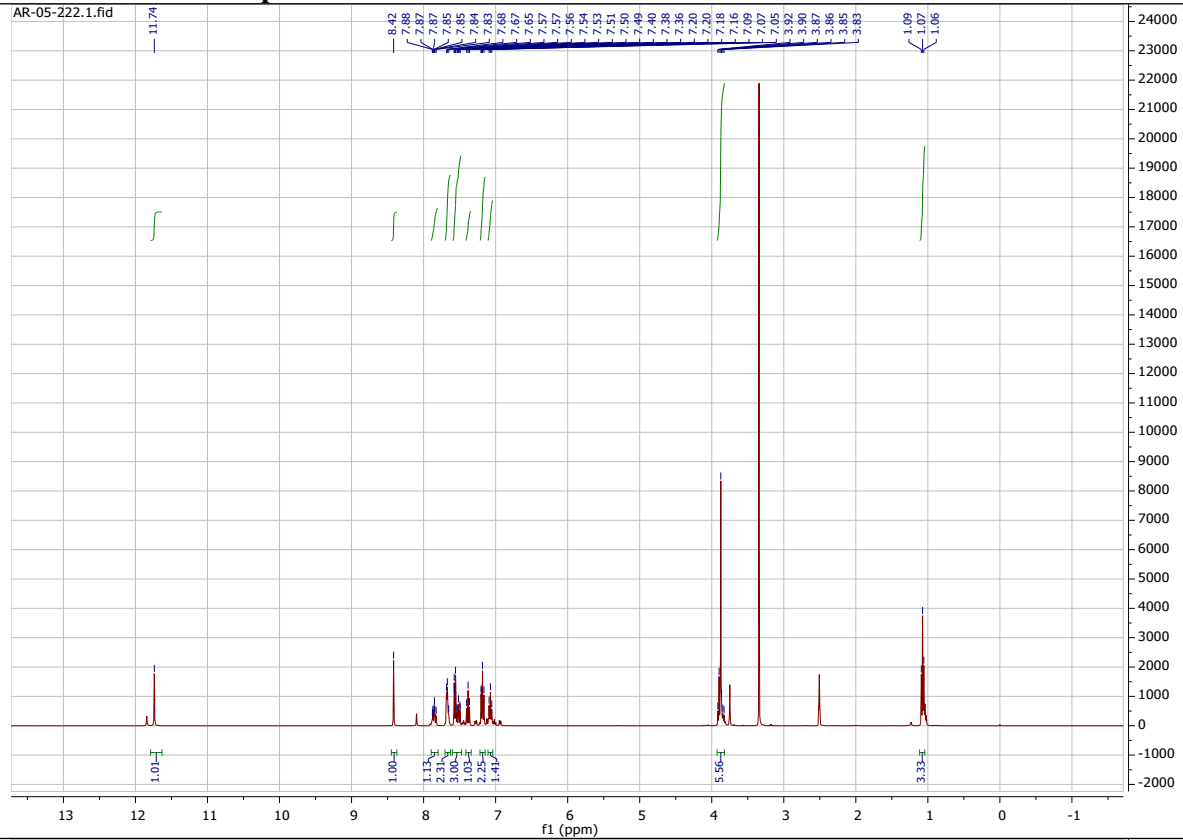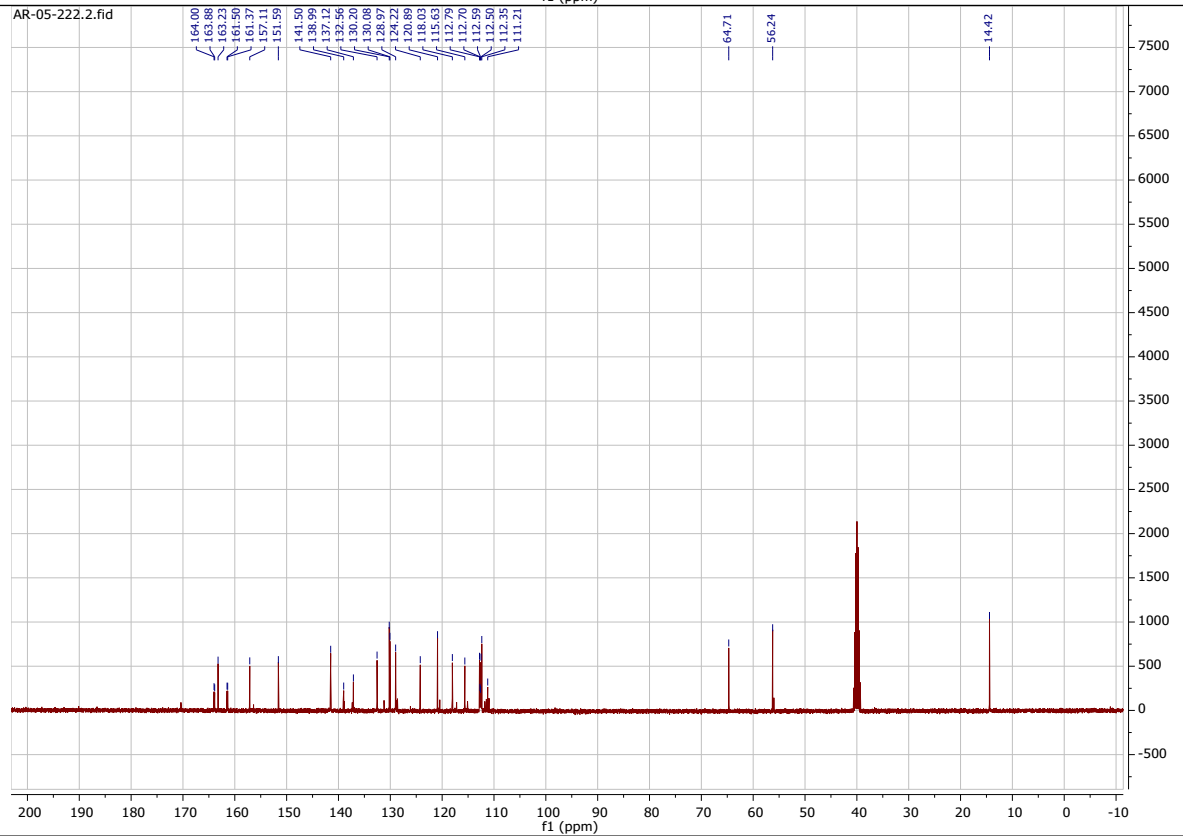

# <sup>1</sup>H and <sup>13</sup>C NMR Spectrum of 5f

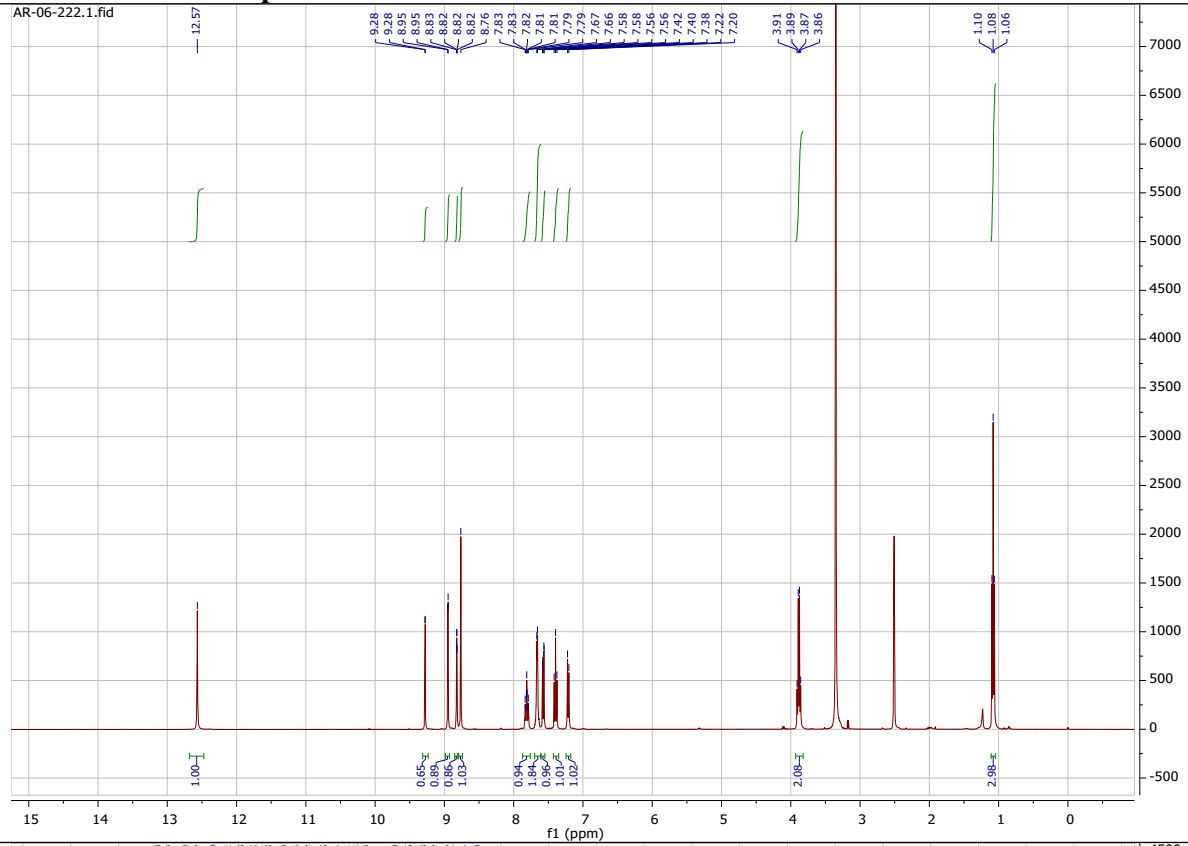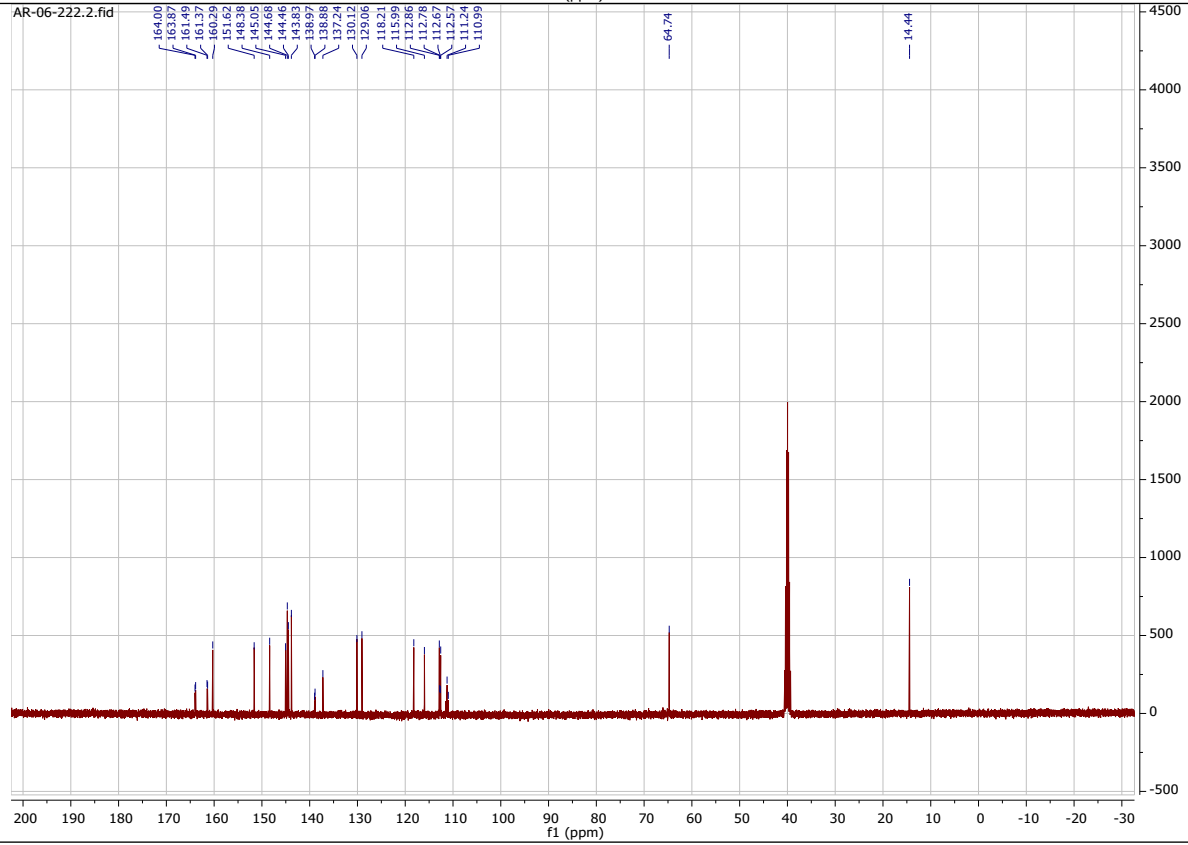

# <sup>1</sup>H and <sup>13</sup>C NMR Spectrum of 5g

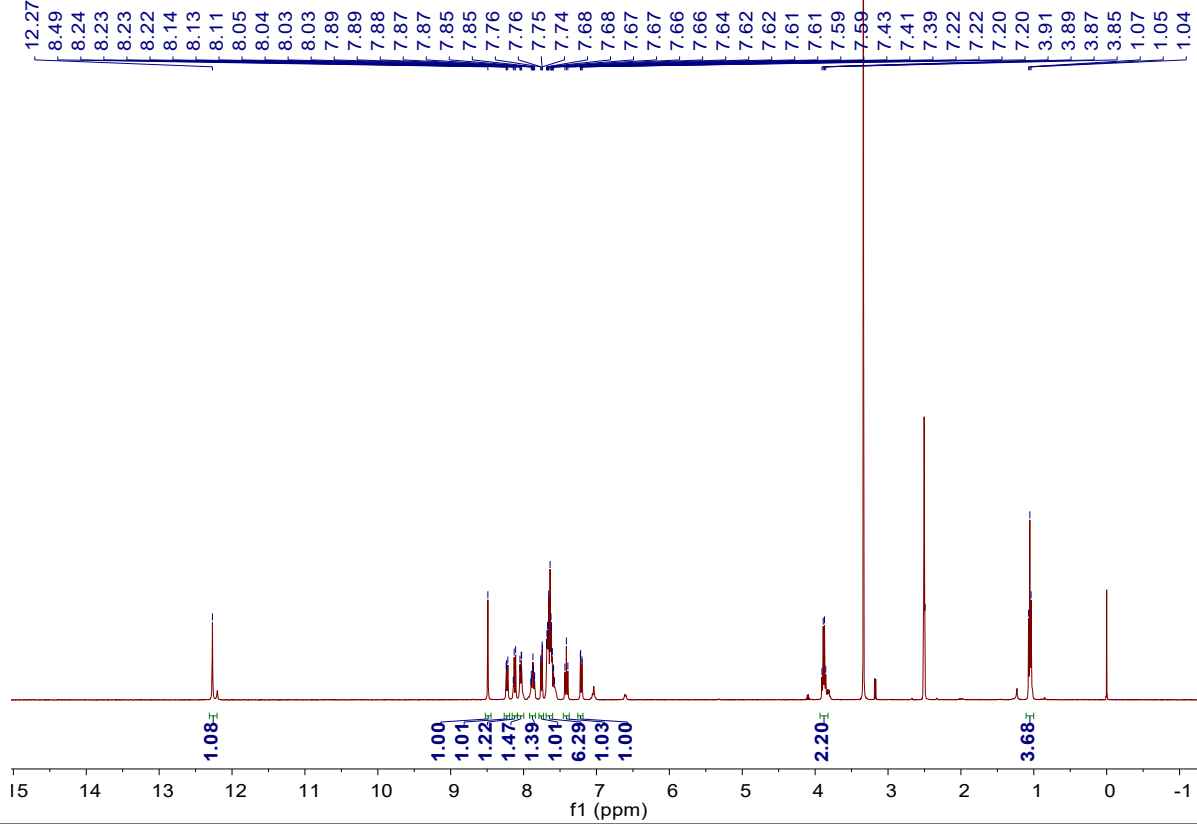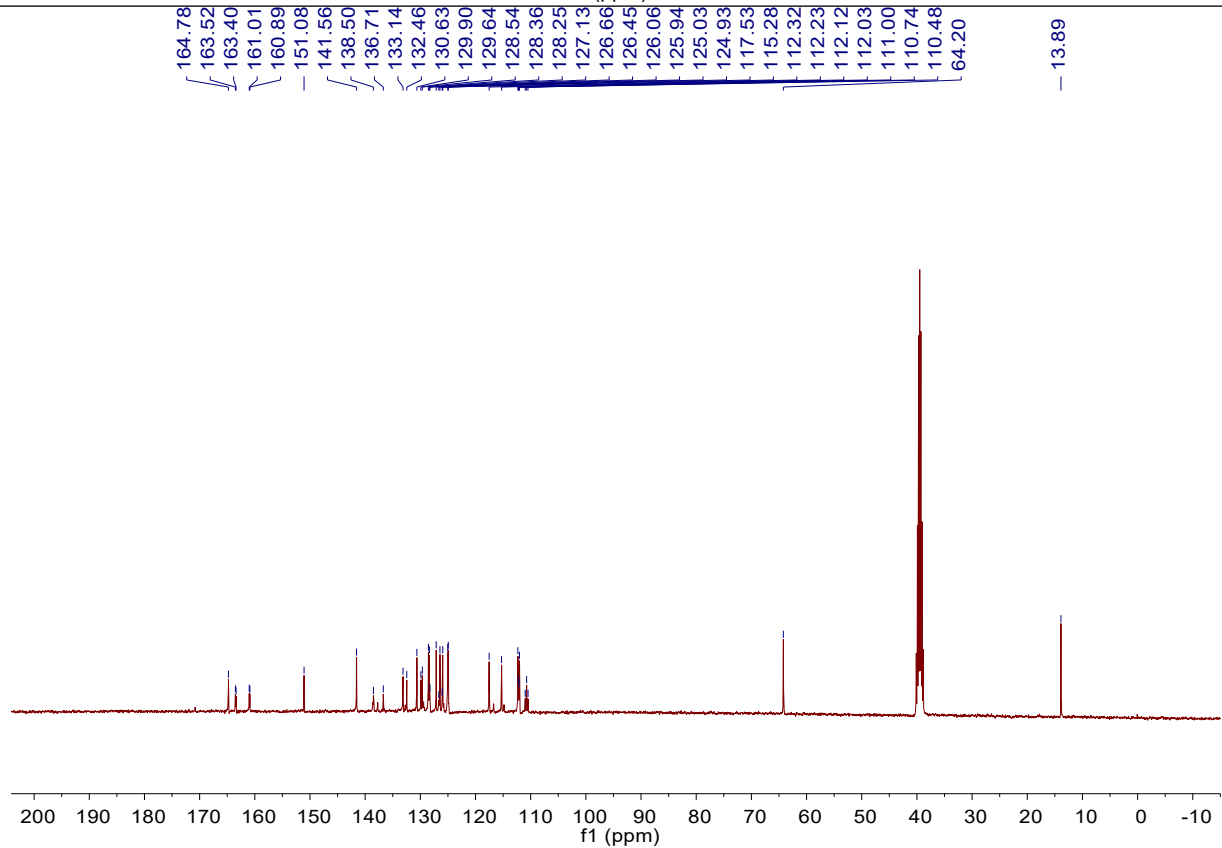

# <sup>1</sup>H and <sup>13</sup>C NMR Spectrum of 5h

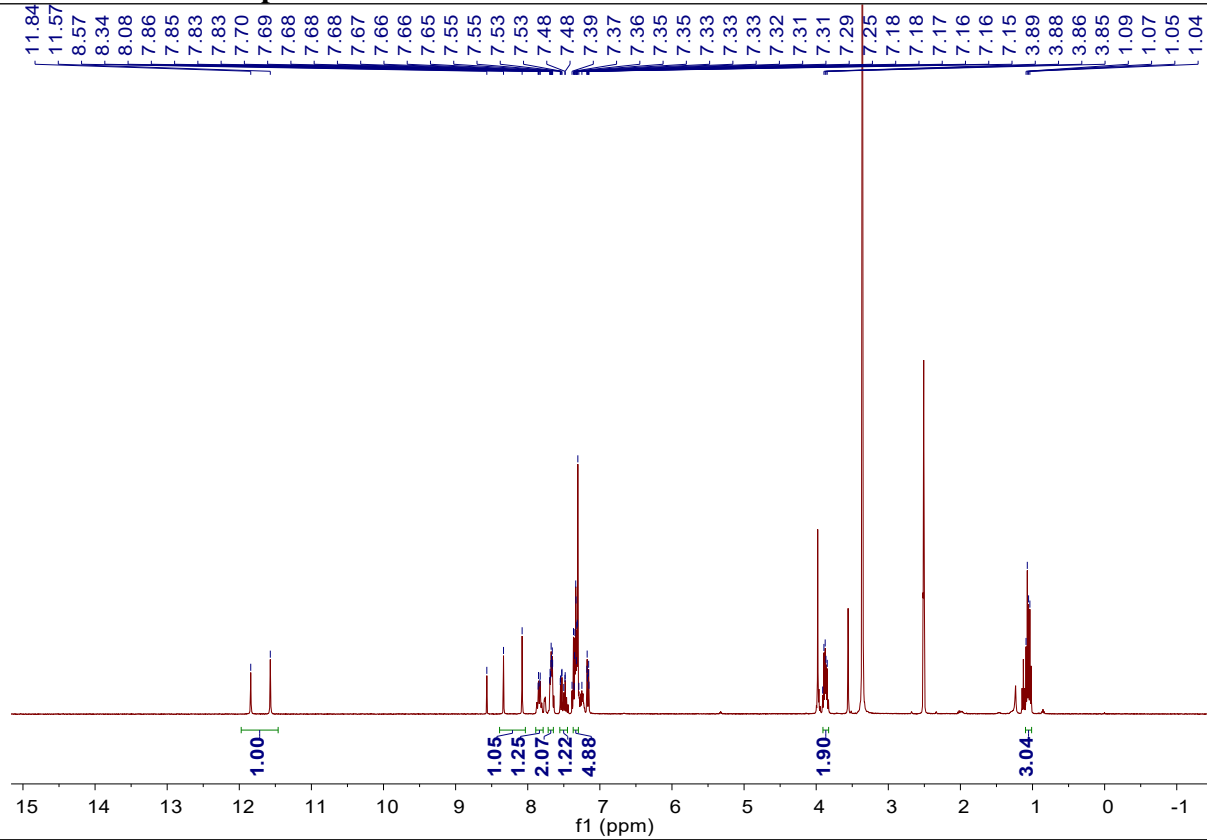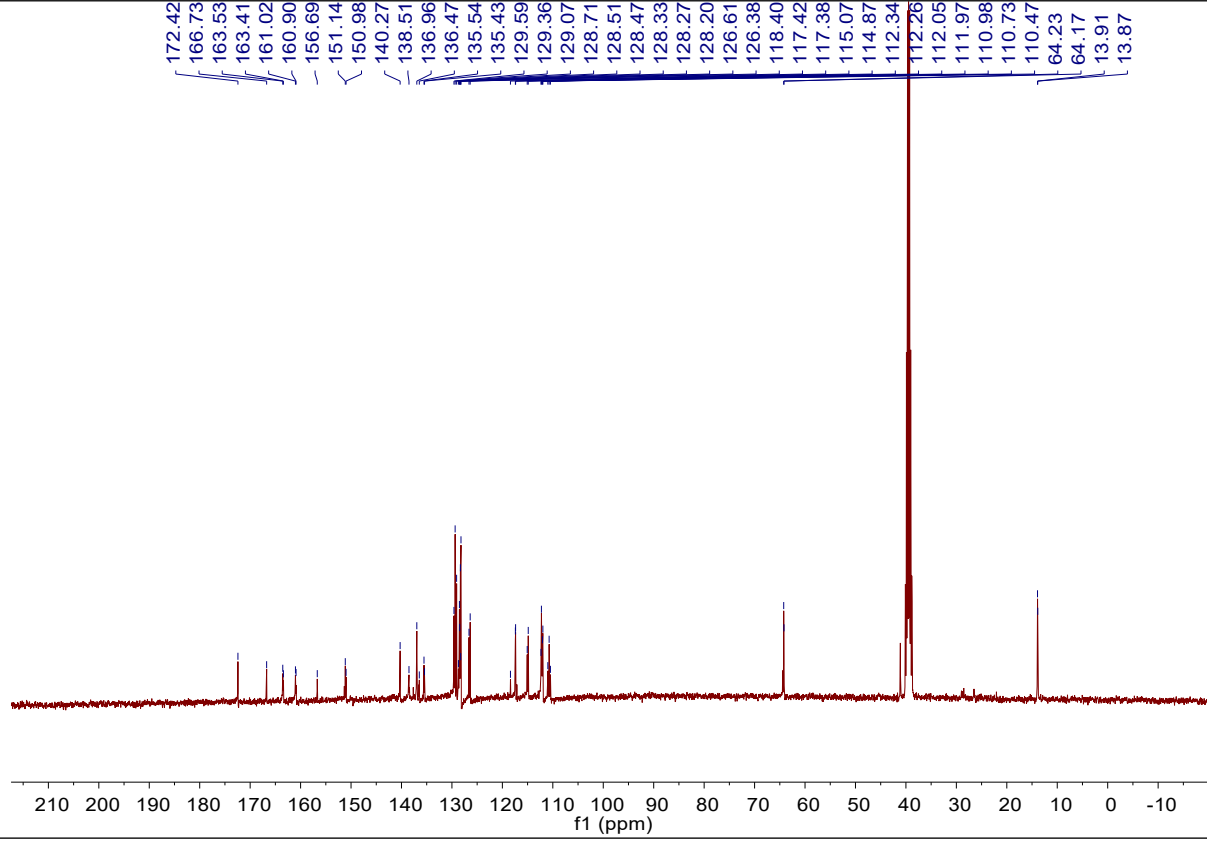

# <sup>1</sup>H and <sup>13</sup>C NMR Spectrum of 5i

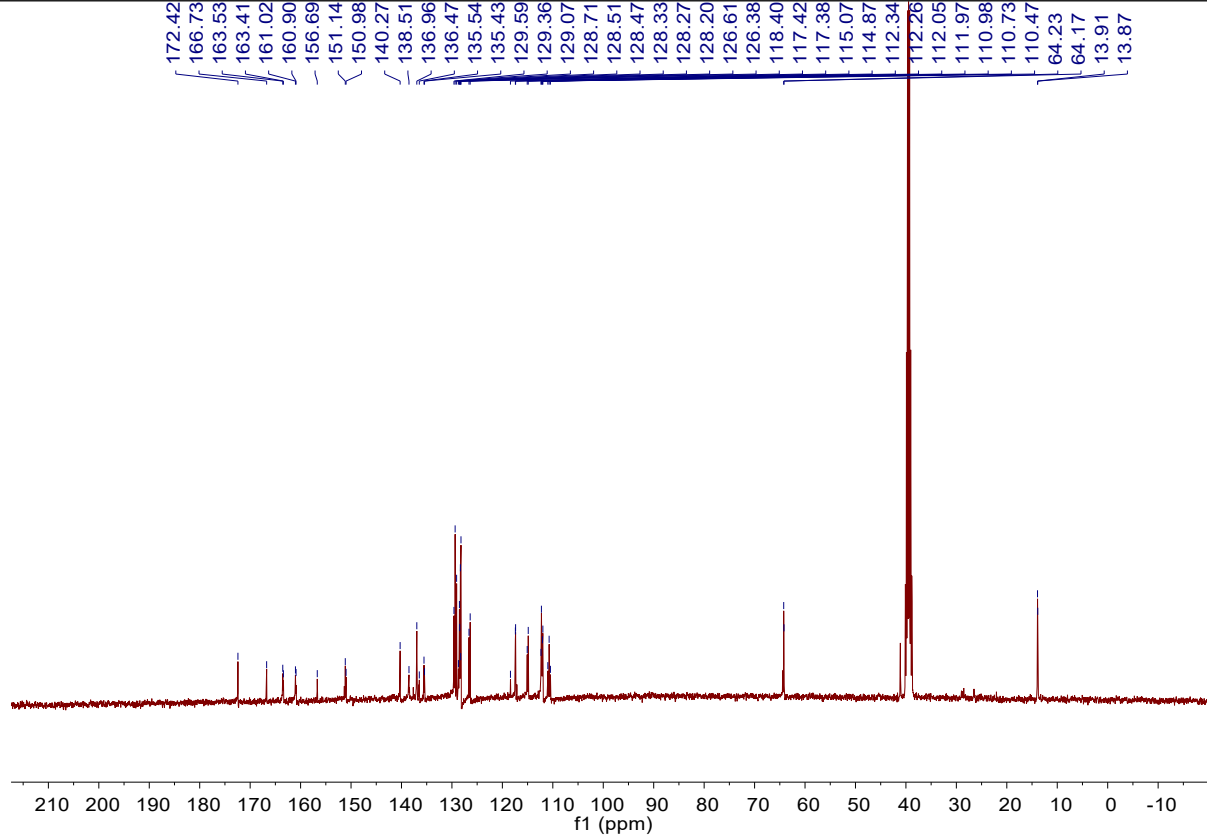

# <sup>1</sup>H and <sup>13</sup>C NMR Spectrum of 5j

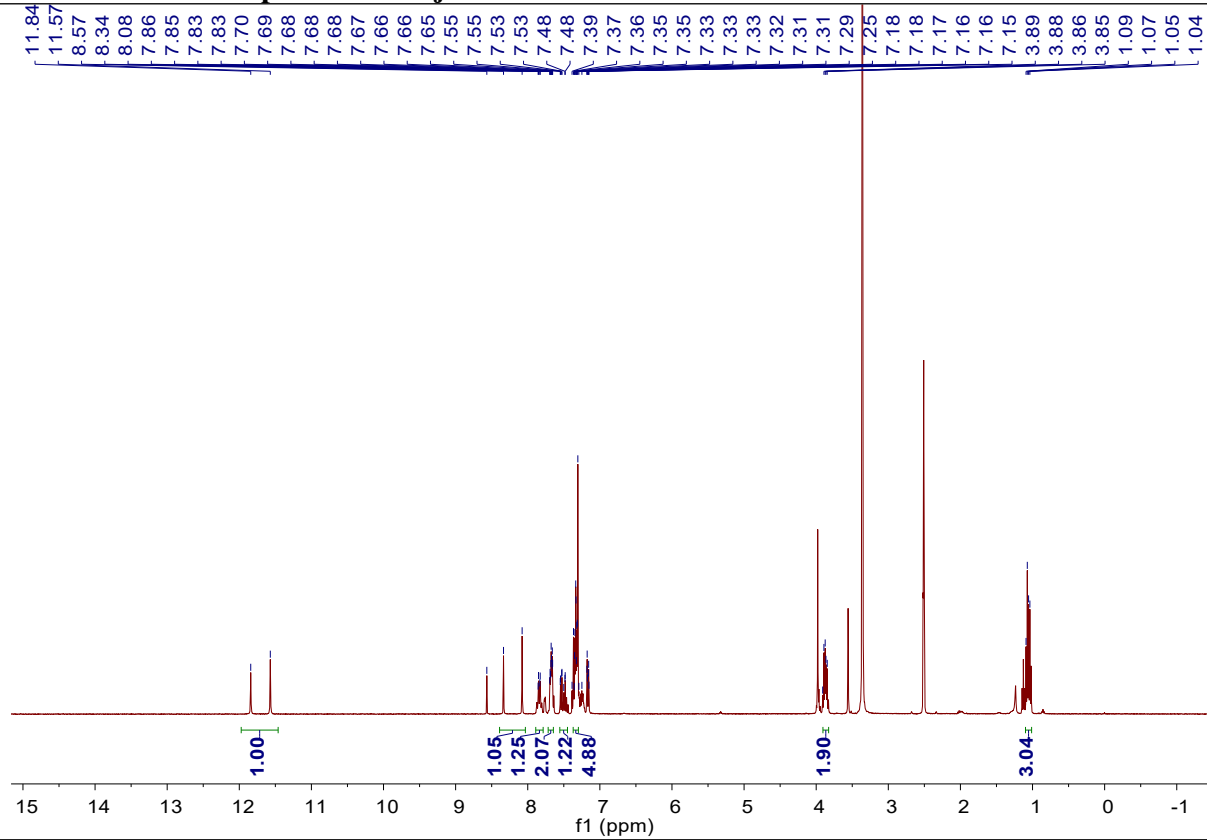

# <sup>1</sup>H and <sup>13</sup>C NMR Spectrum of 5k

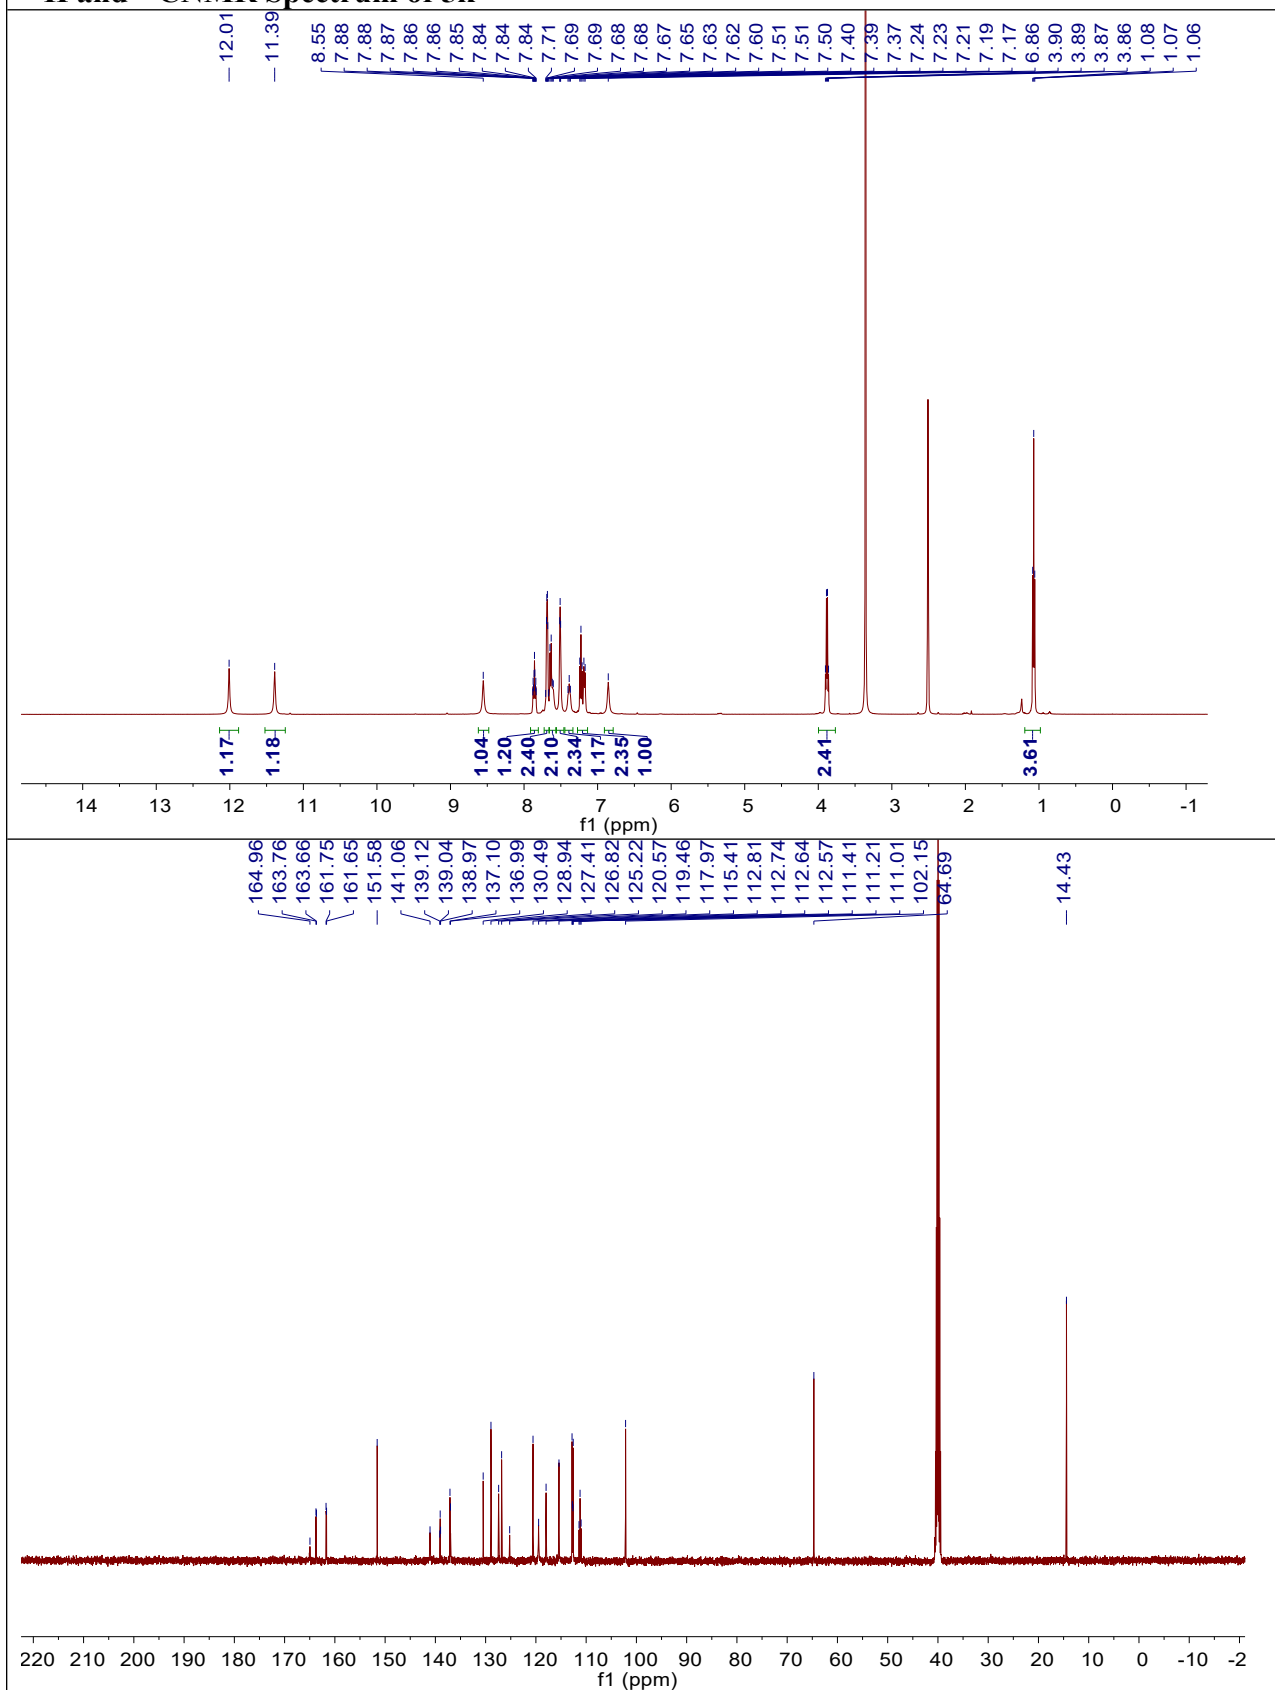

# <sup>1</sup>H and <sup>13</sup>C NMR Spectrum of 5l

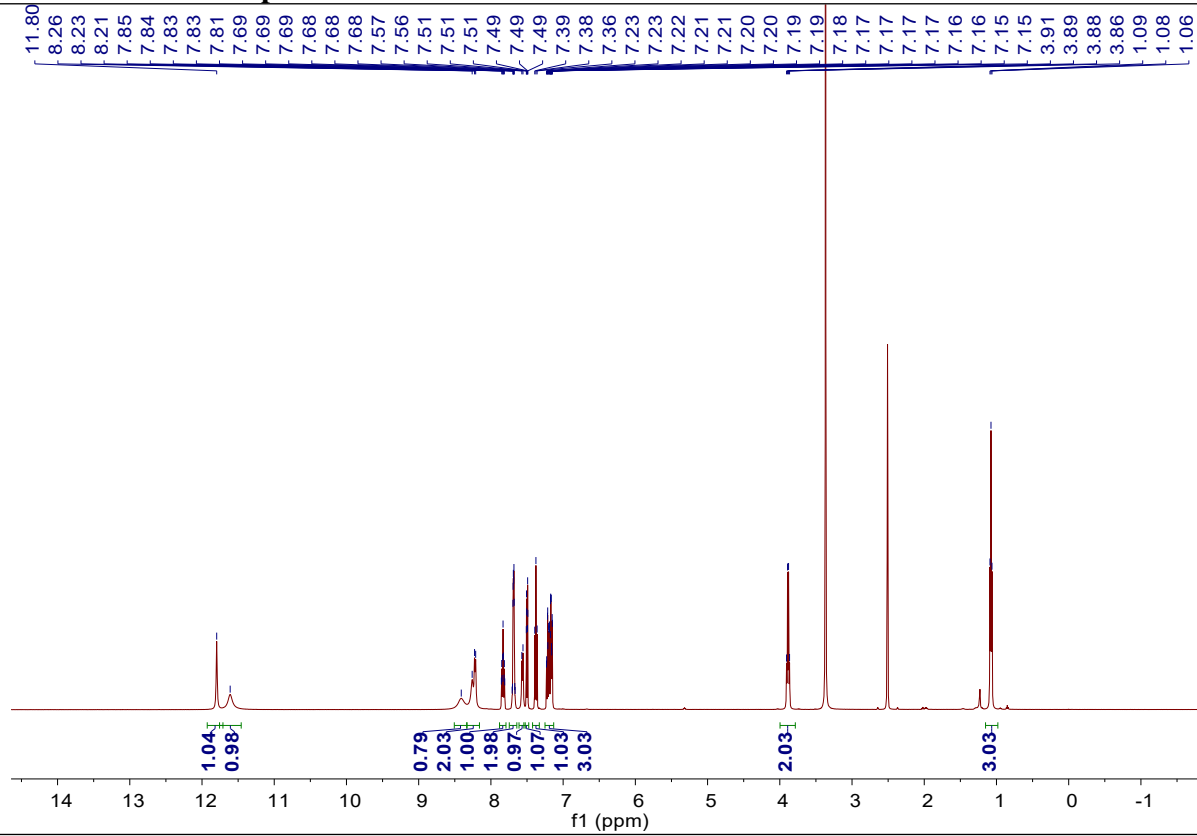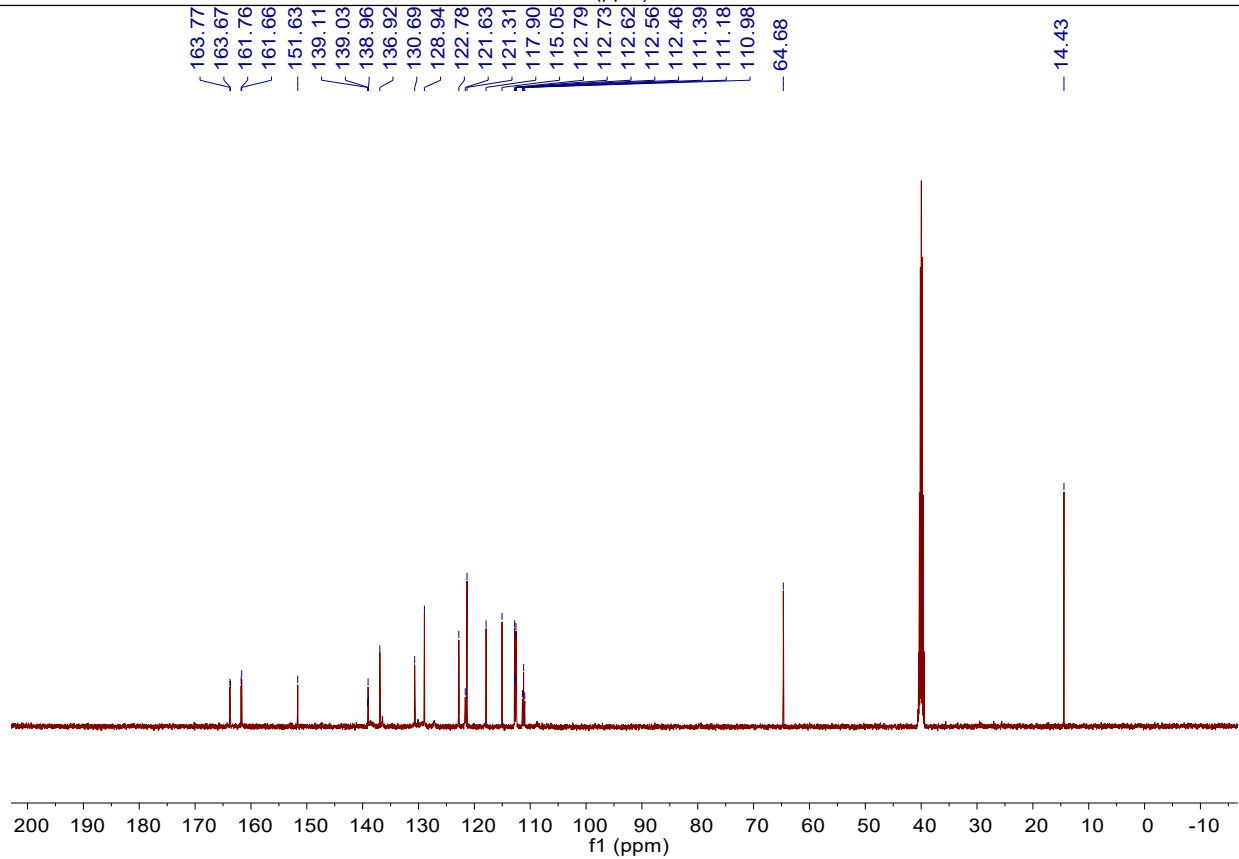

# <sup>1</sup>H and <sup>13</sup>C NMR Spectrum of 5m

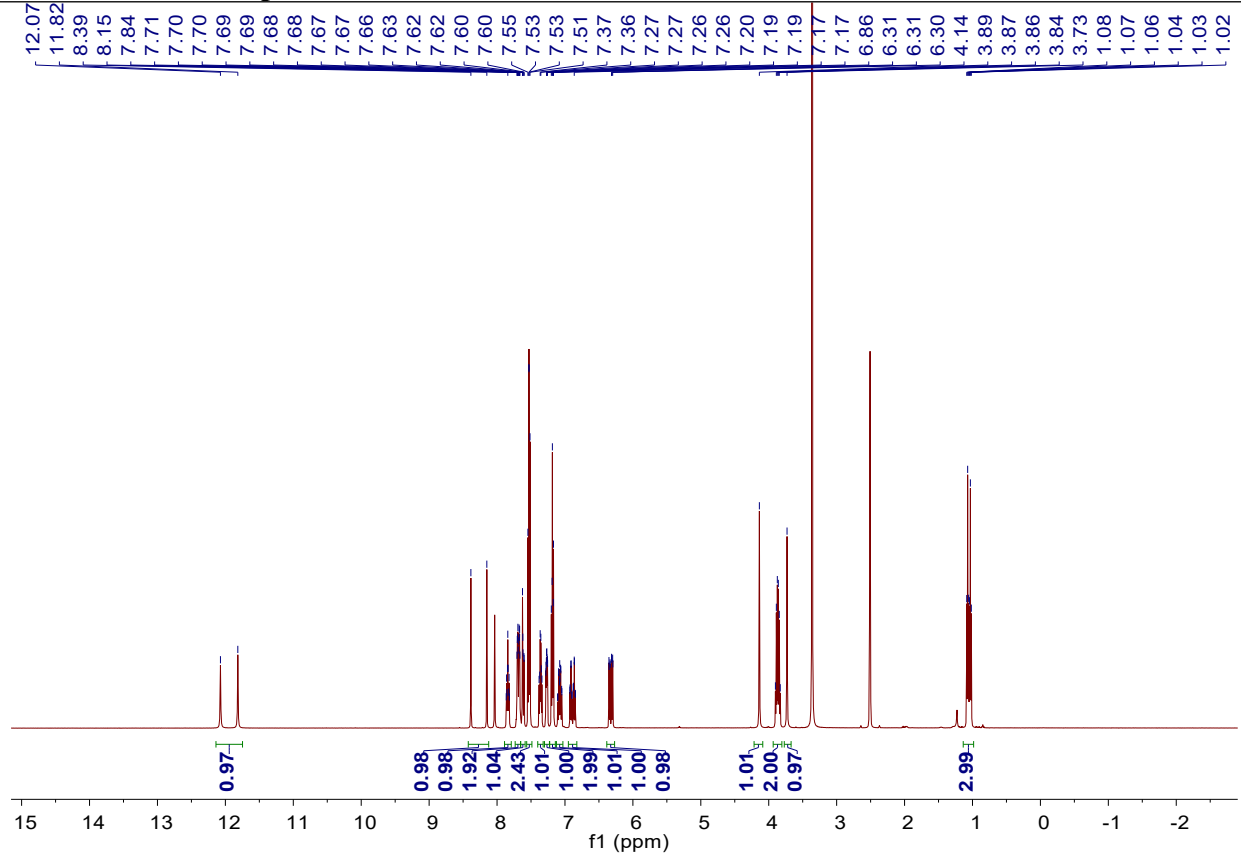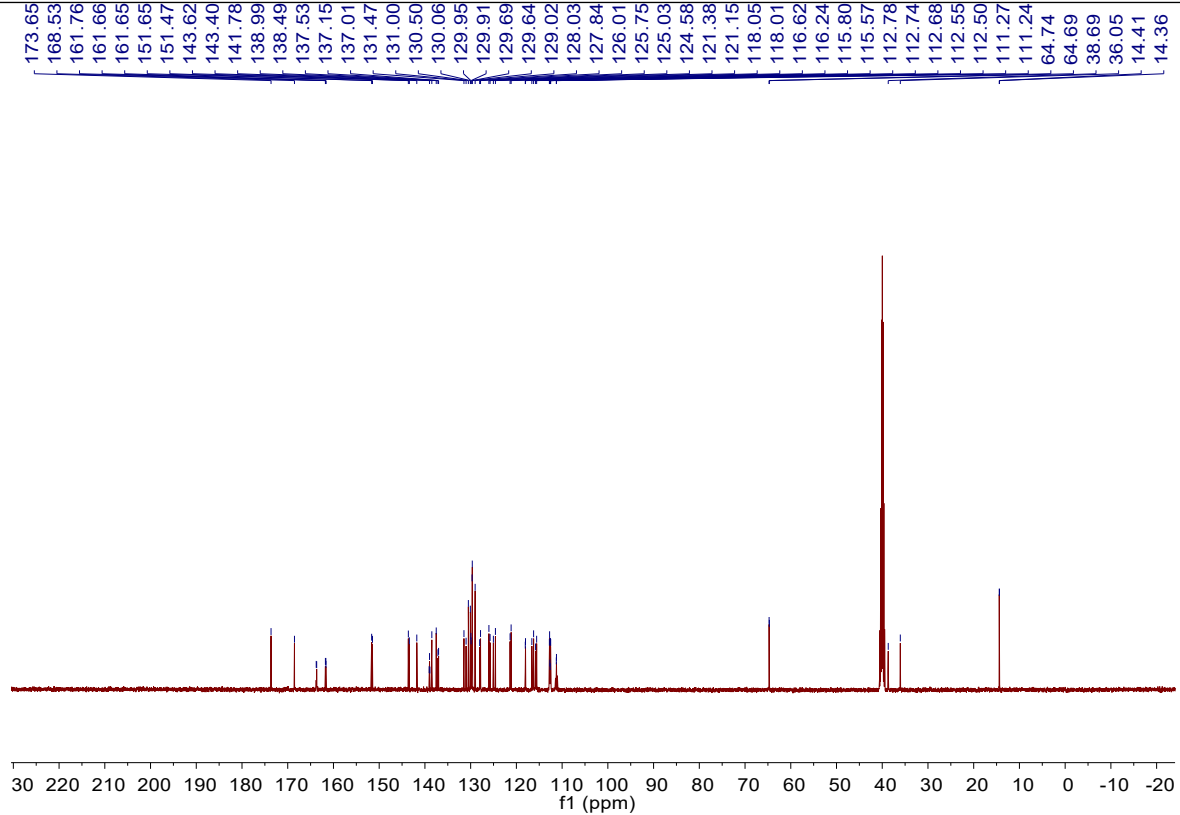

# <sup>1</sup>H and <sup>13</sup>C NMR Spectrum of 5n

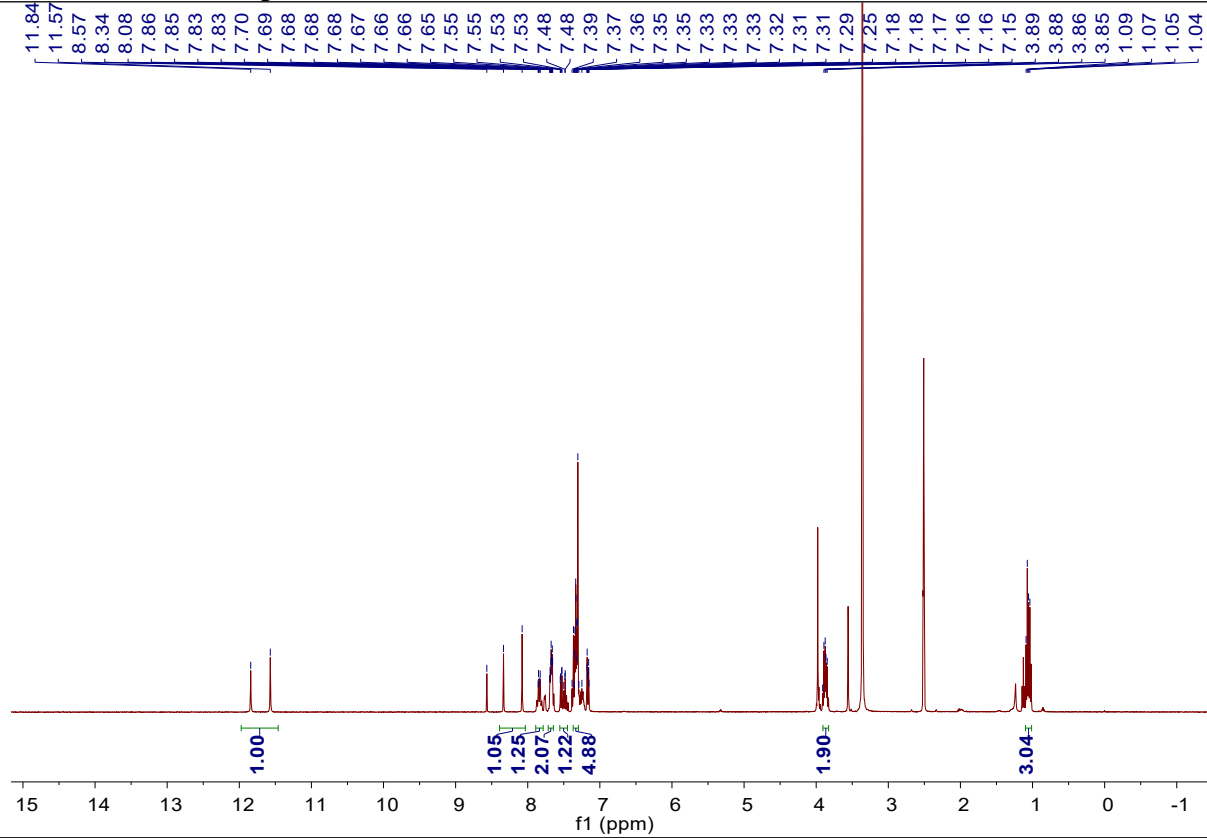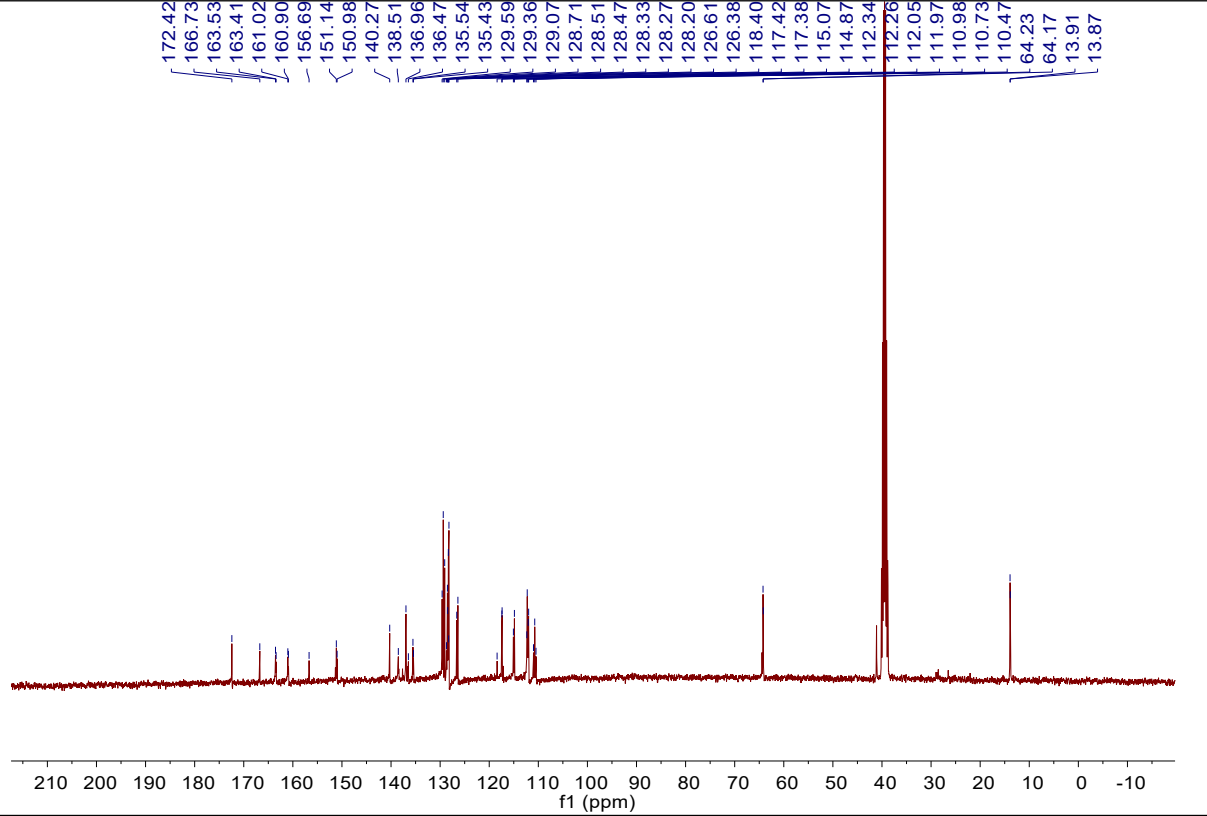

# <sup>1</sup>H and <sup>13</sup>C NMR Spectrum of 50

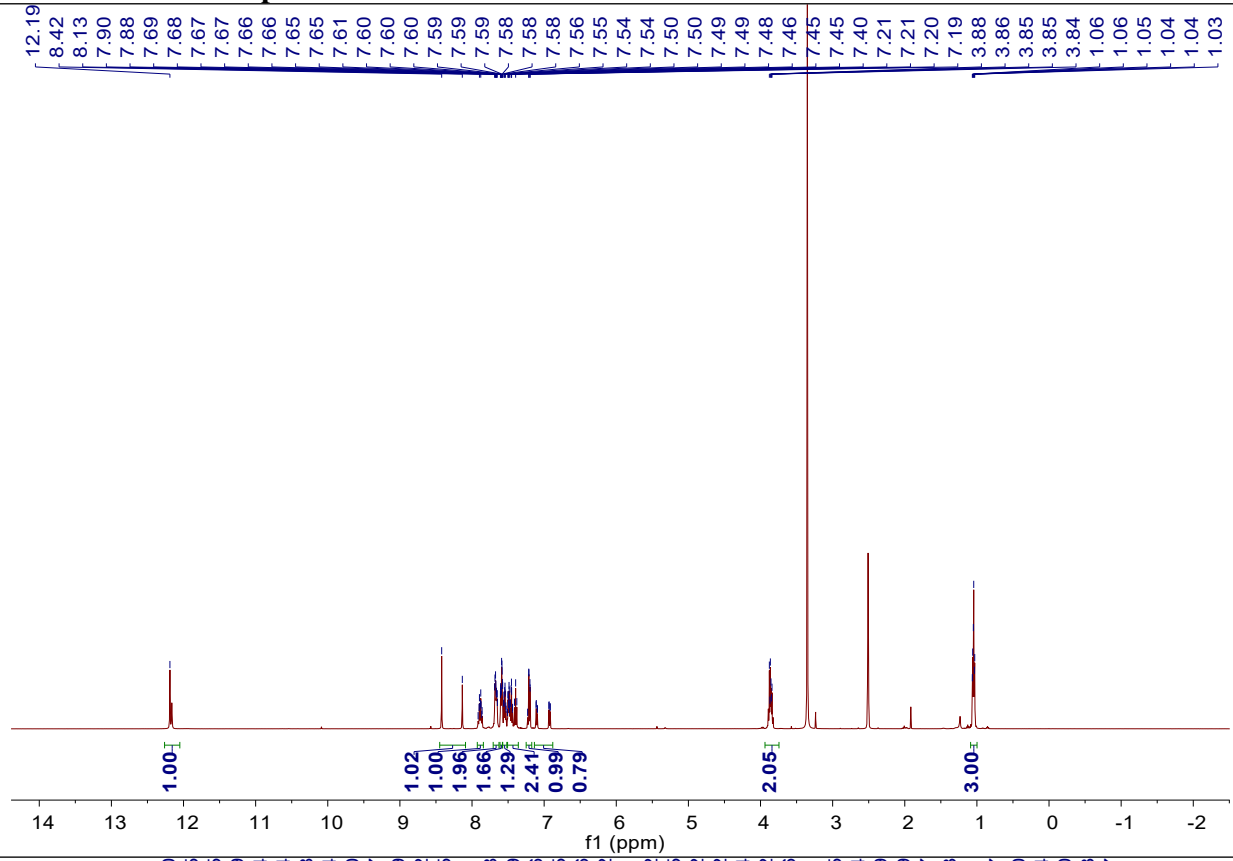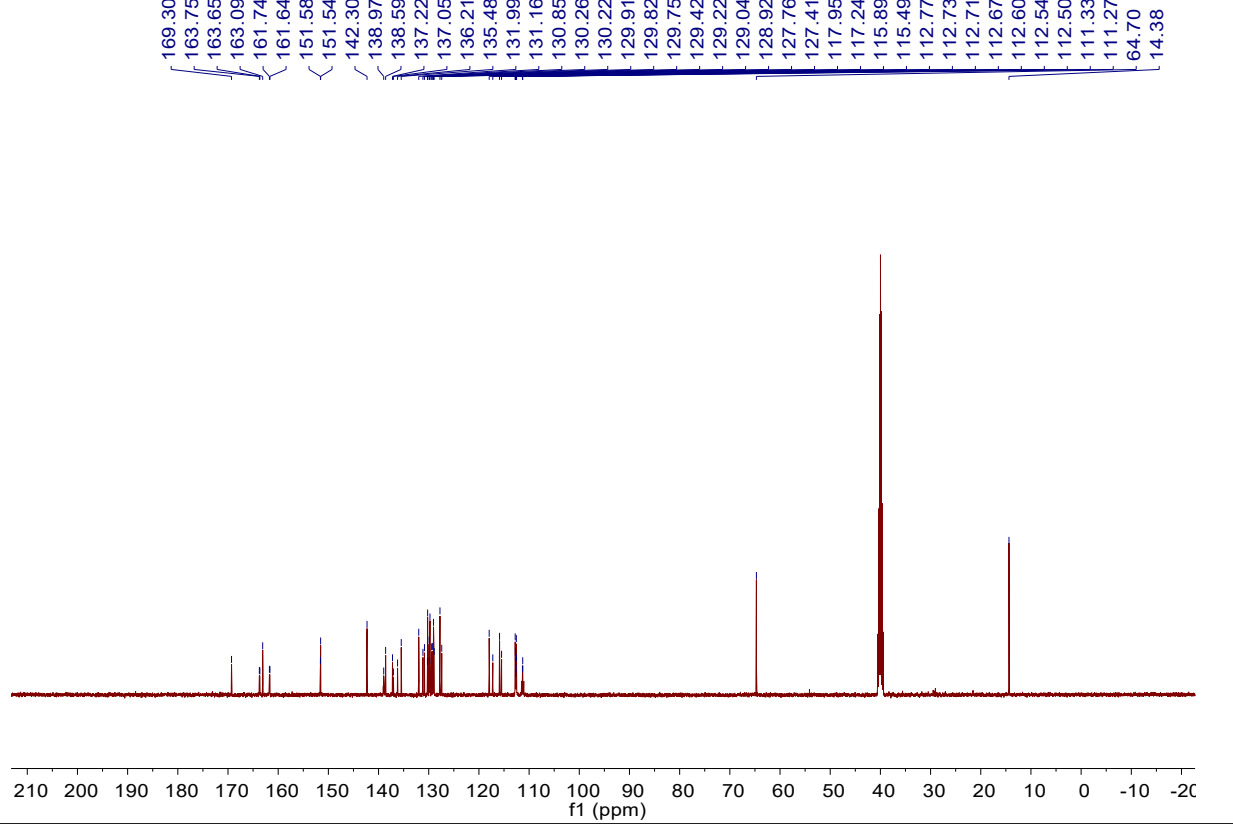

# <sup>1</sup>H and <sup>13</sup>C NMR Spectrum of 5p

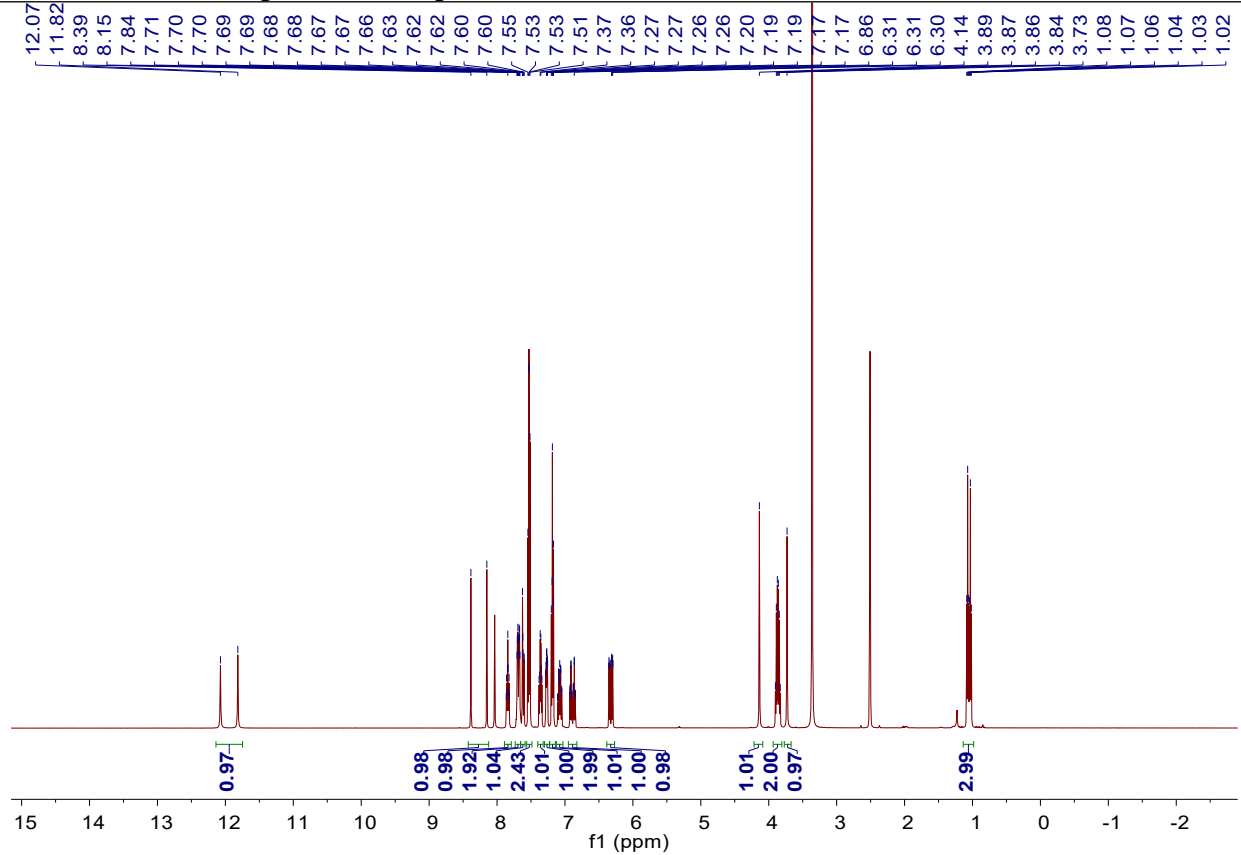

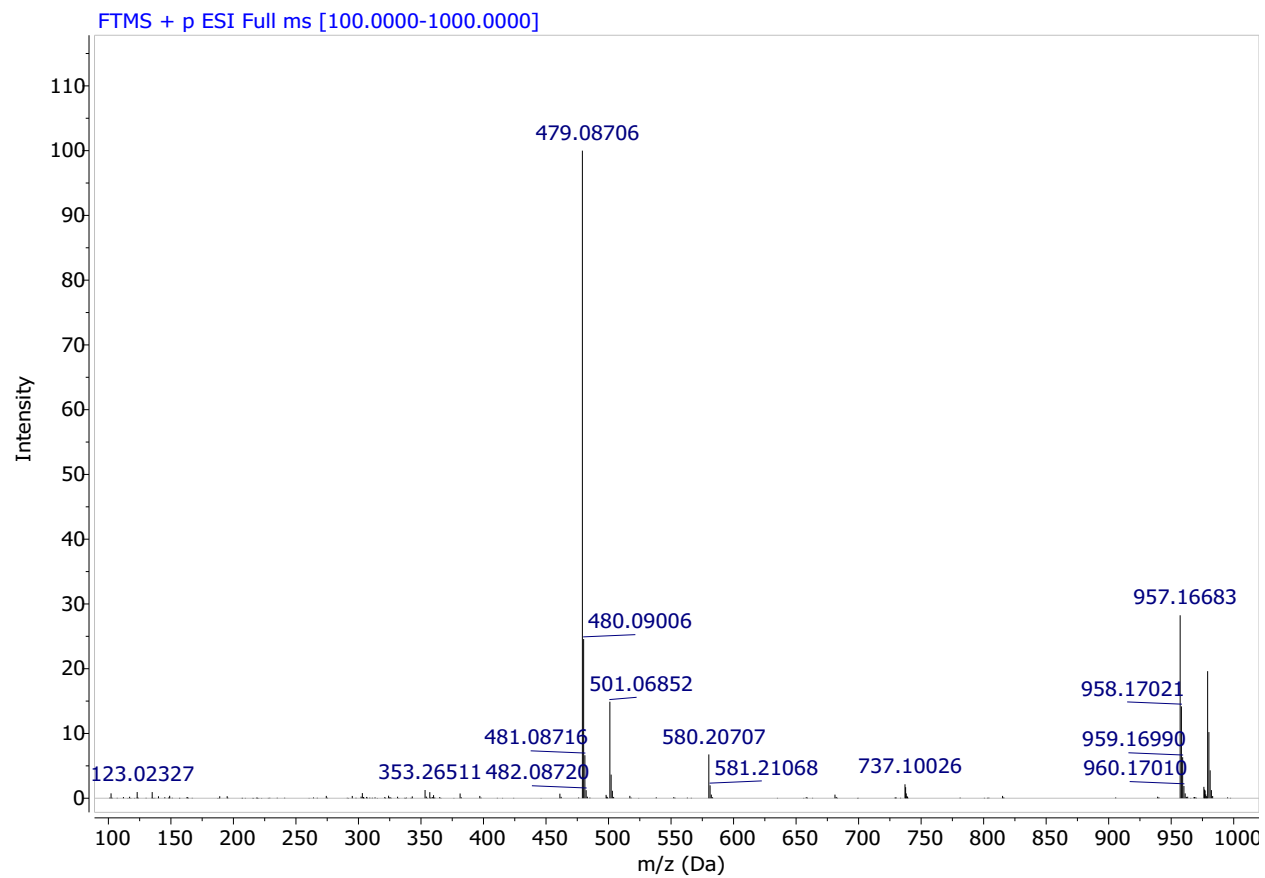

HRMS Spectrum of Compound **5a**

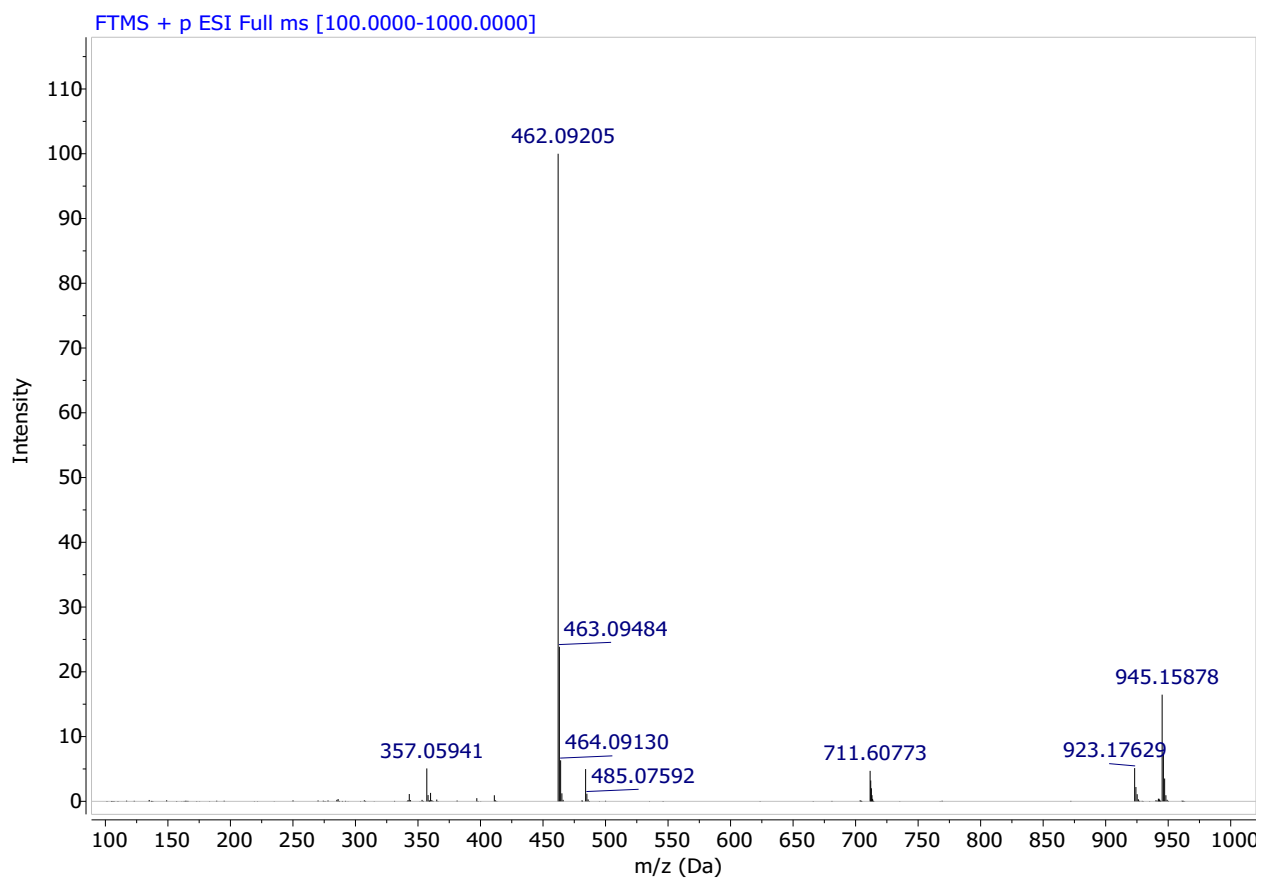

HRMS Spectrum of Compound **5b**

FTMS + p ESI Full ms [100.0000-1000.0000]

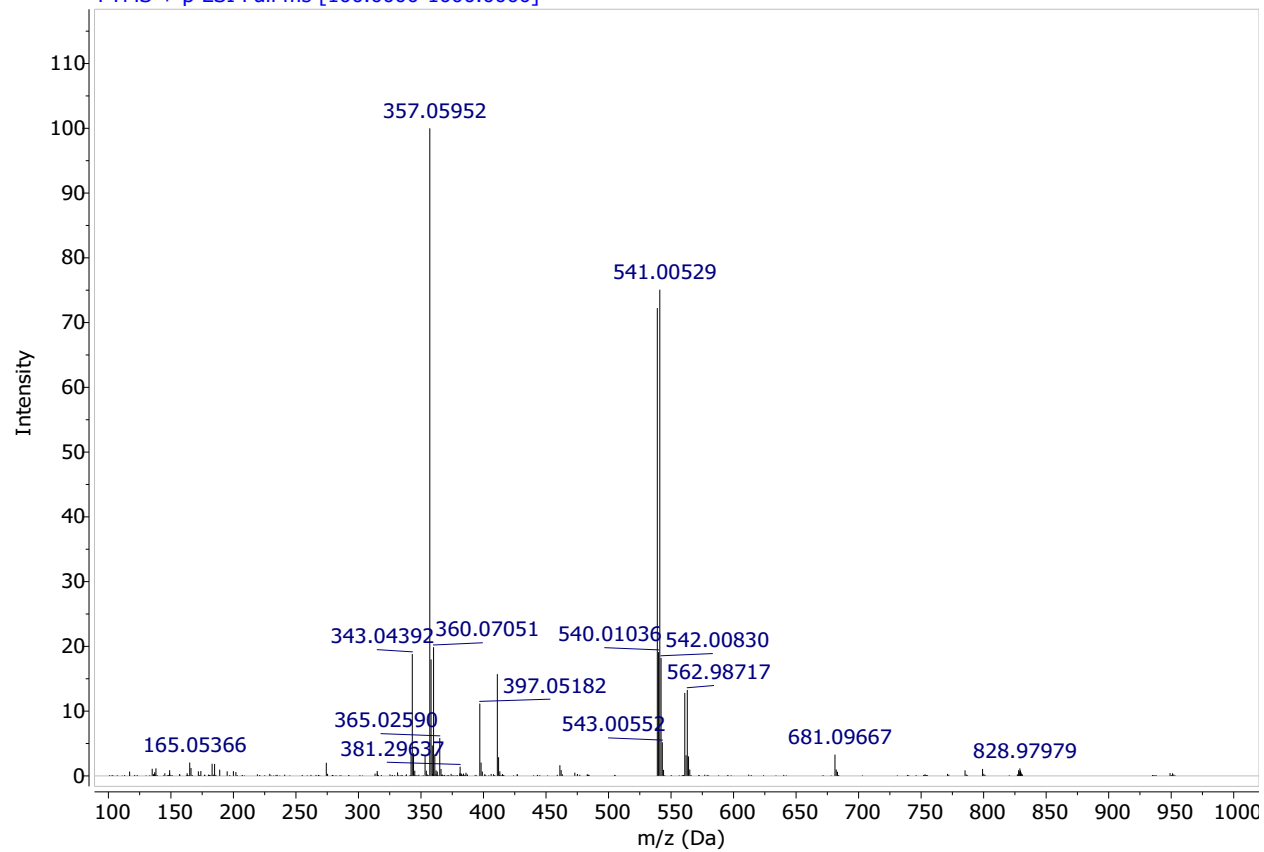

HRMS Spectrum of Compound 5c

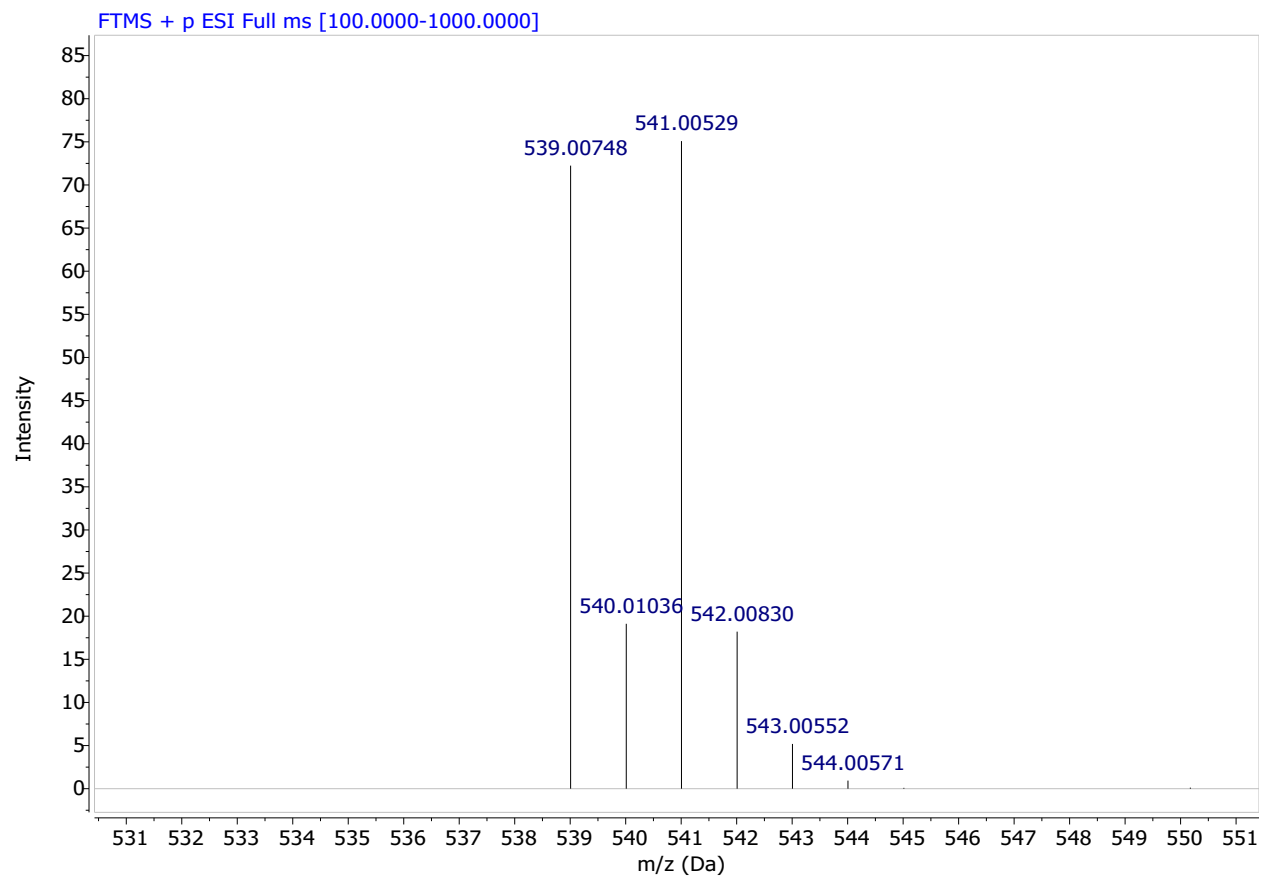

HRMS Spectrum of Compound **5c** (Extended)

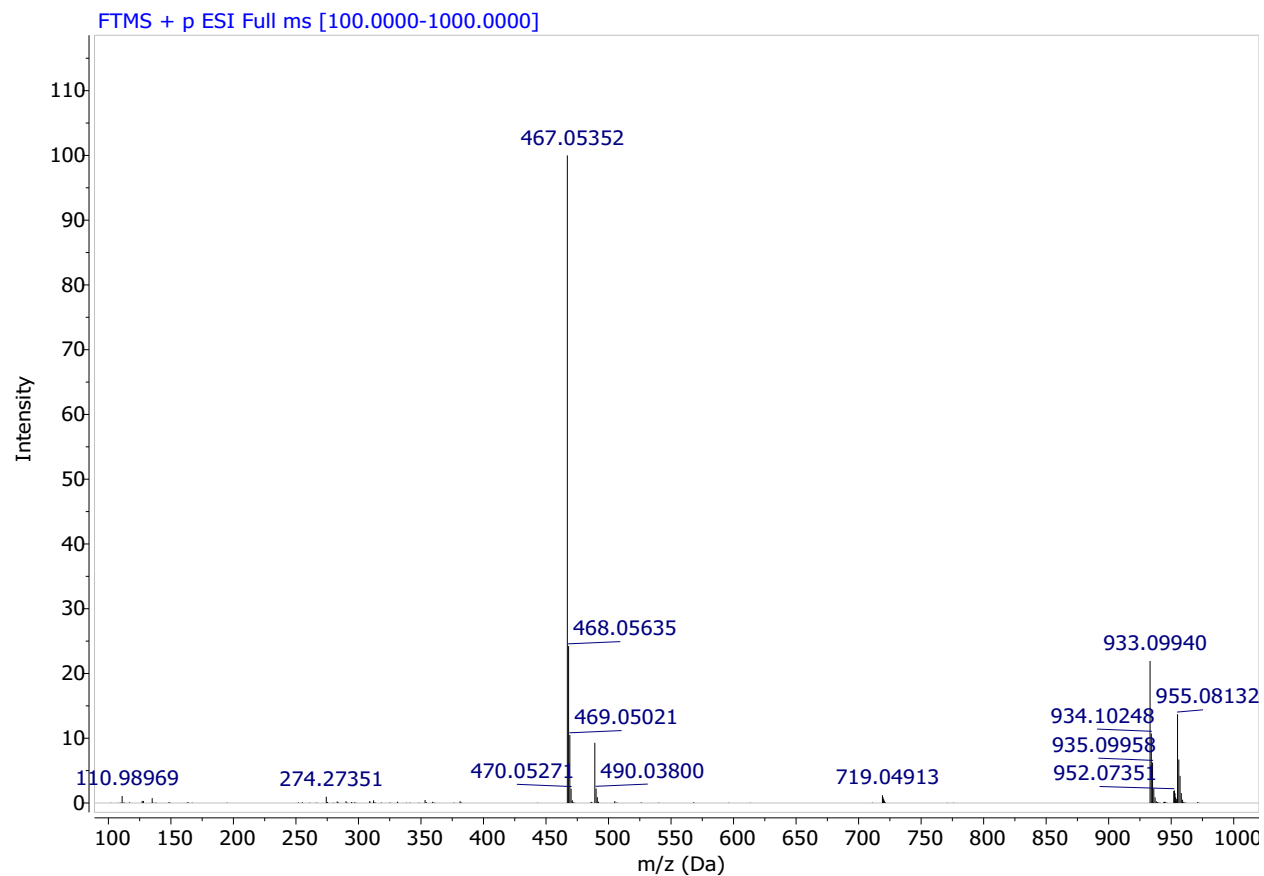

**HRMS Spectrum of Compound 5d**

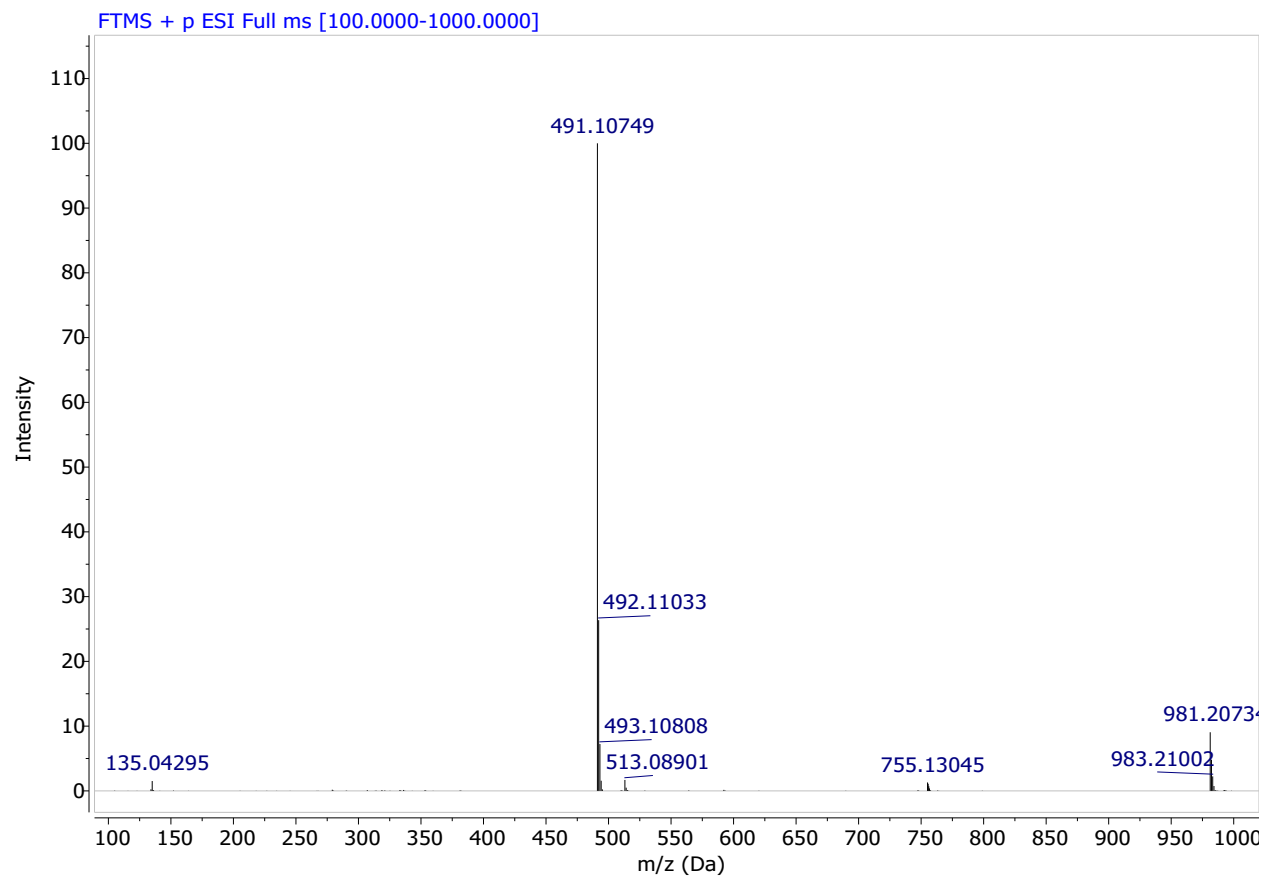

HRMS Spectrum of Compound **5e**

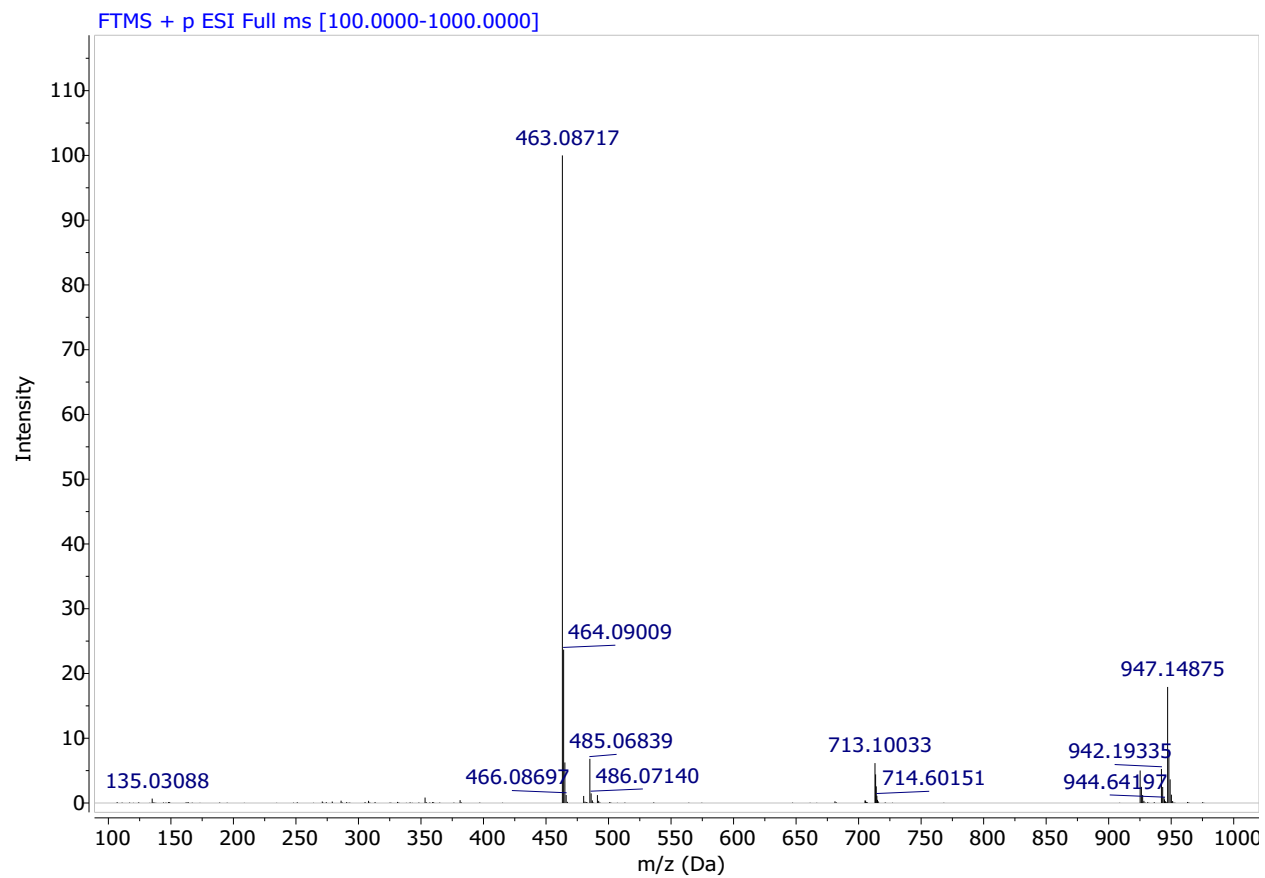

HRMS Spectrum of Compound **5f**

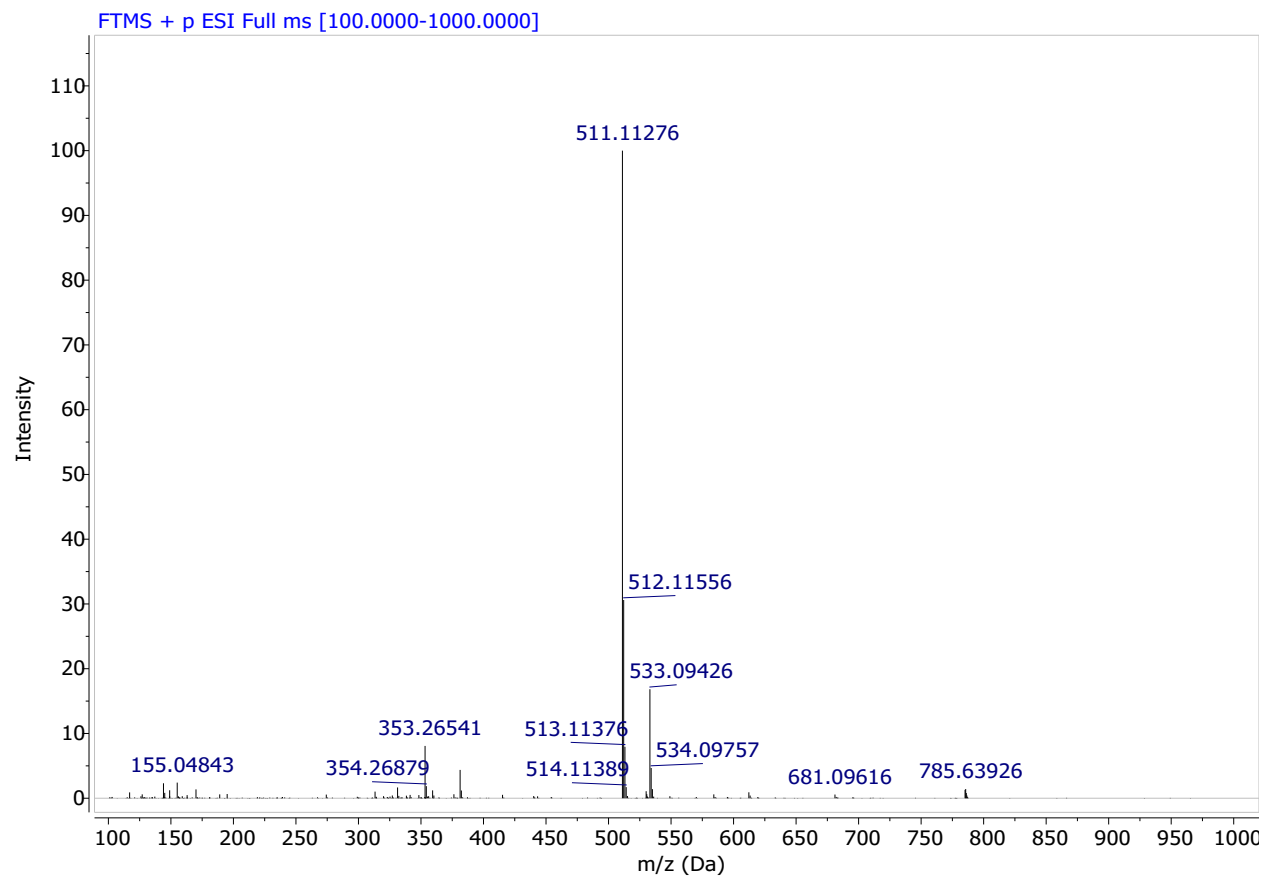

HRMS Spectrum of Compound **5g**

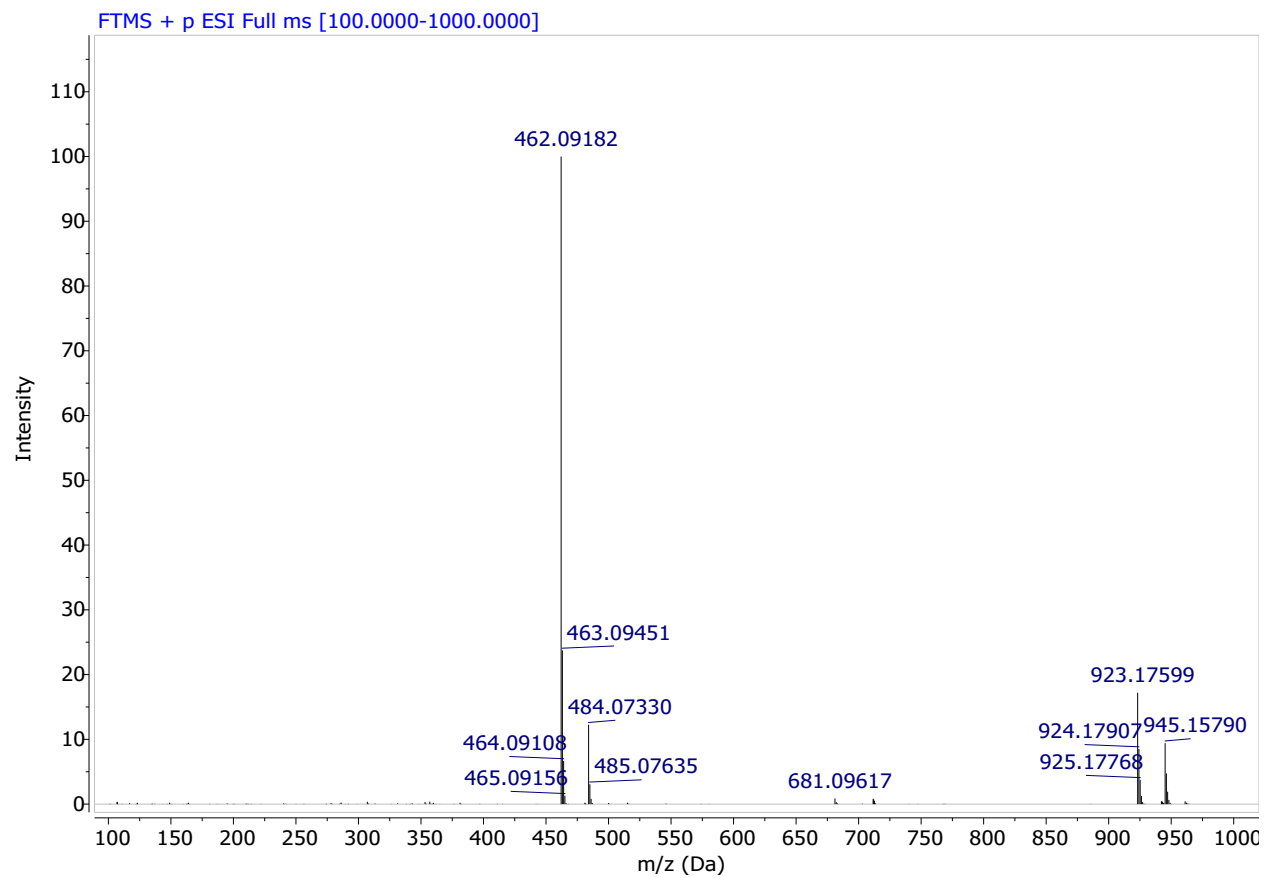

HRMS Spectrum of Compound **5h**

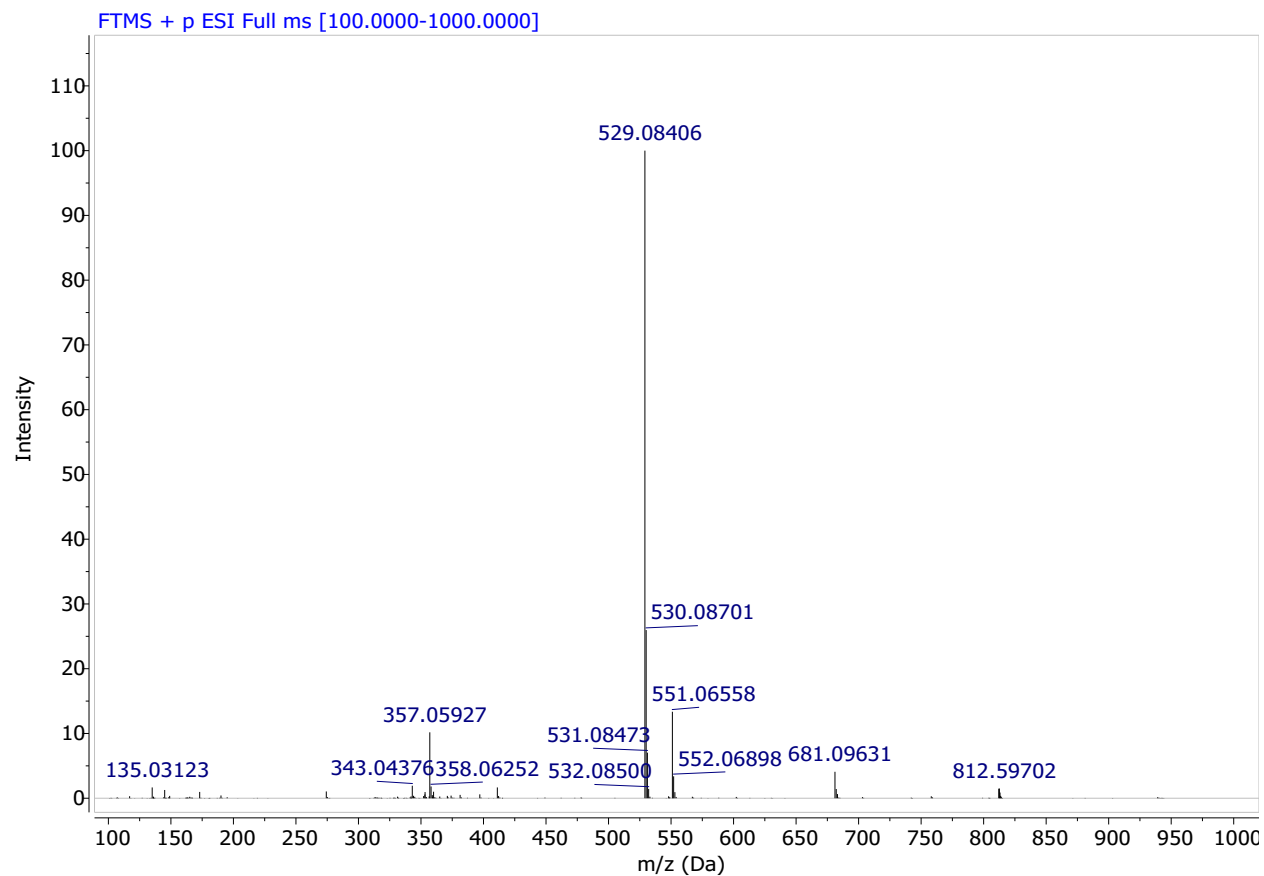

**HRMS Spectrum of Compound 5i**

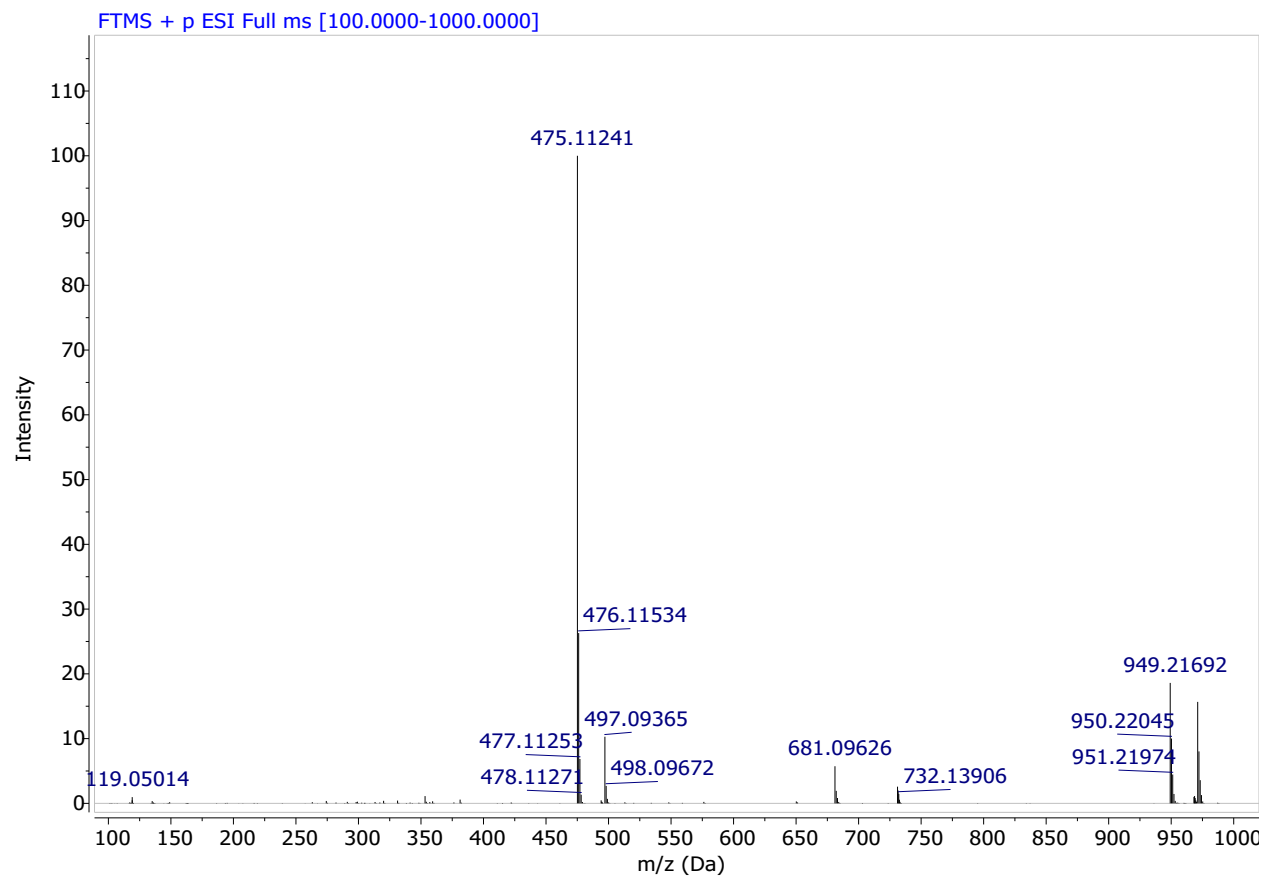

HRMS Spectrum of Compound **5j**

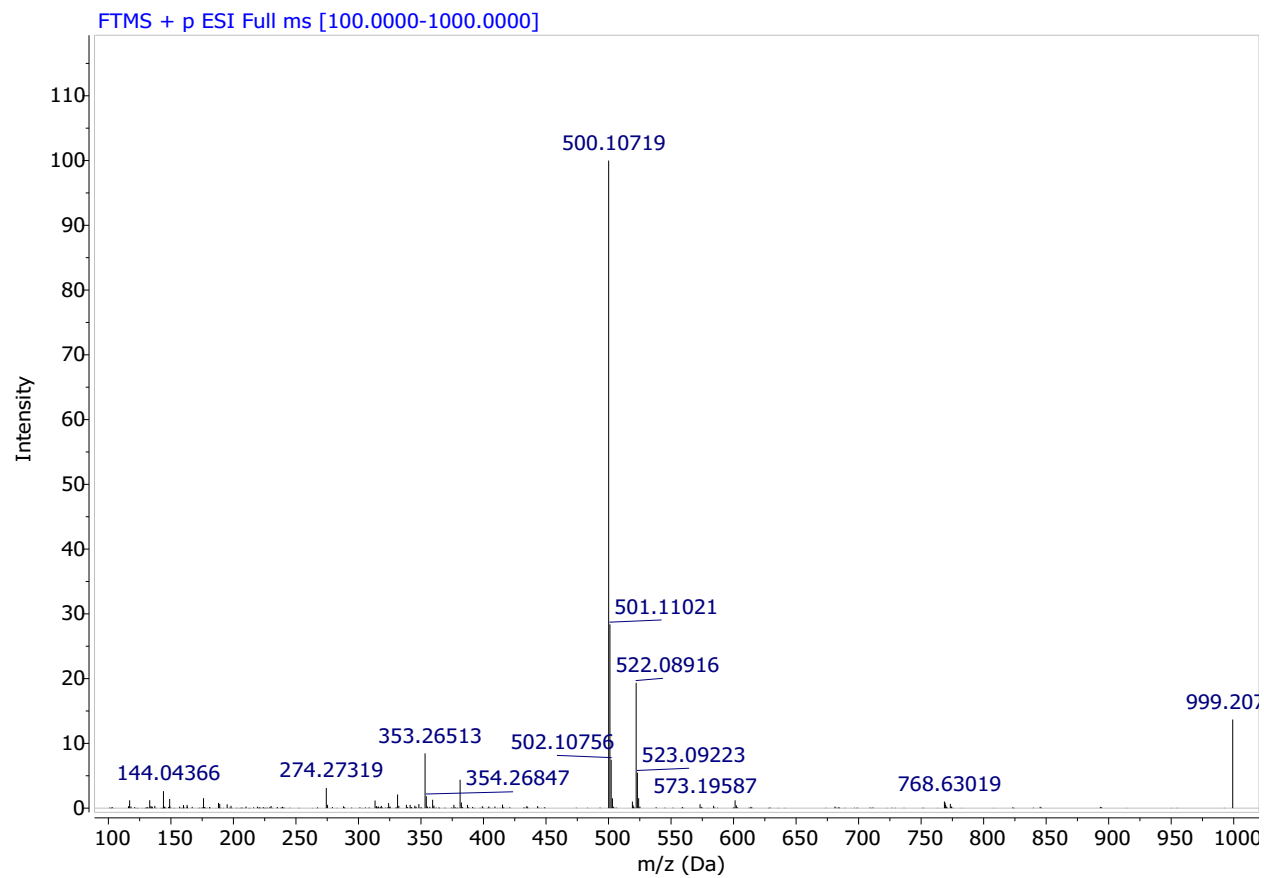

HRMS Spectrum of Compound **5k**

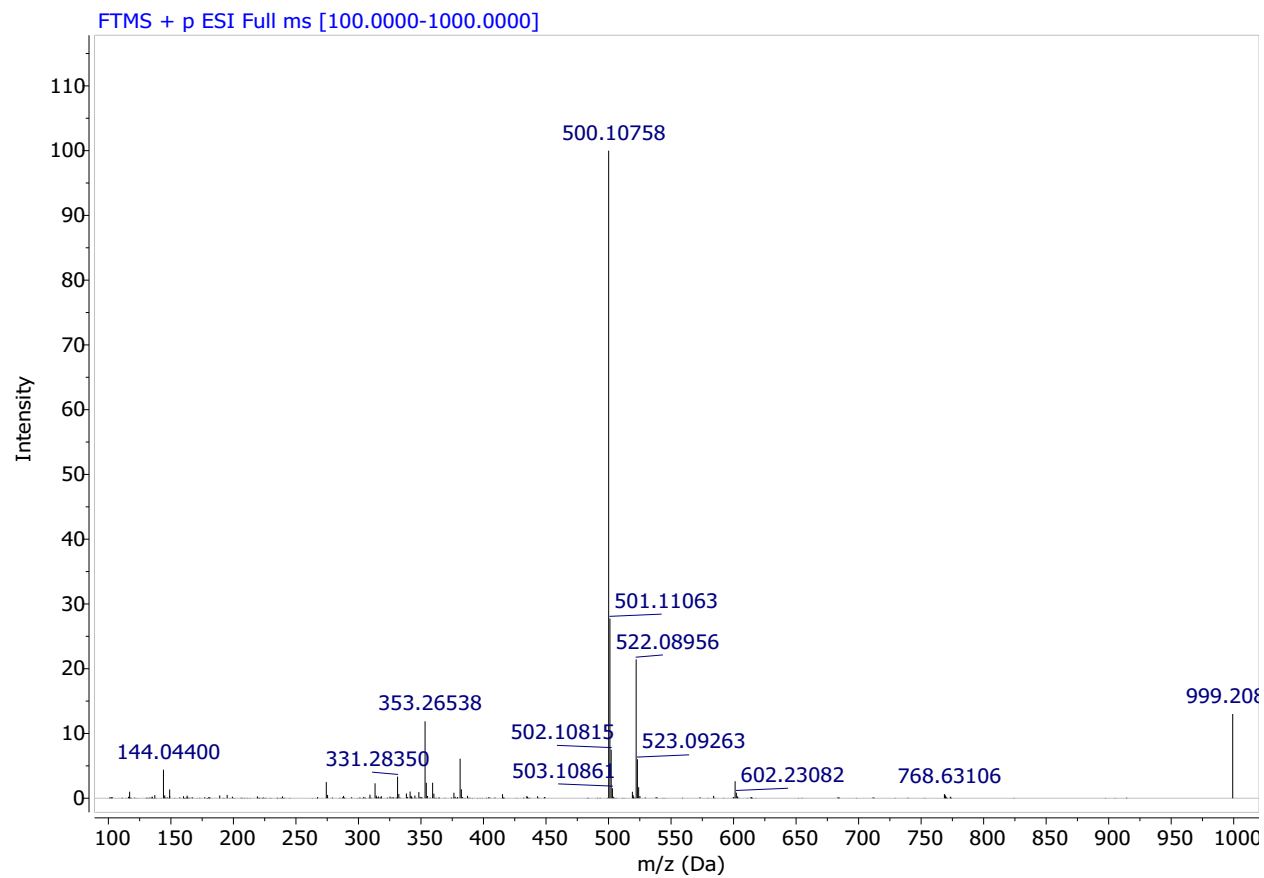

**HRMS Spectrum of Compound 5l**

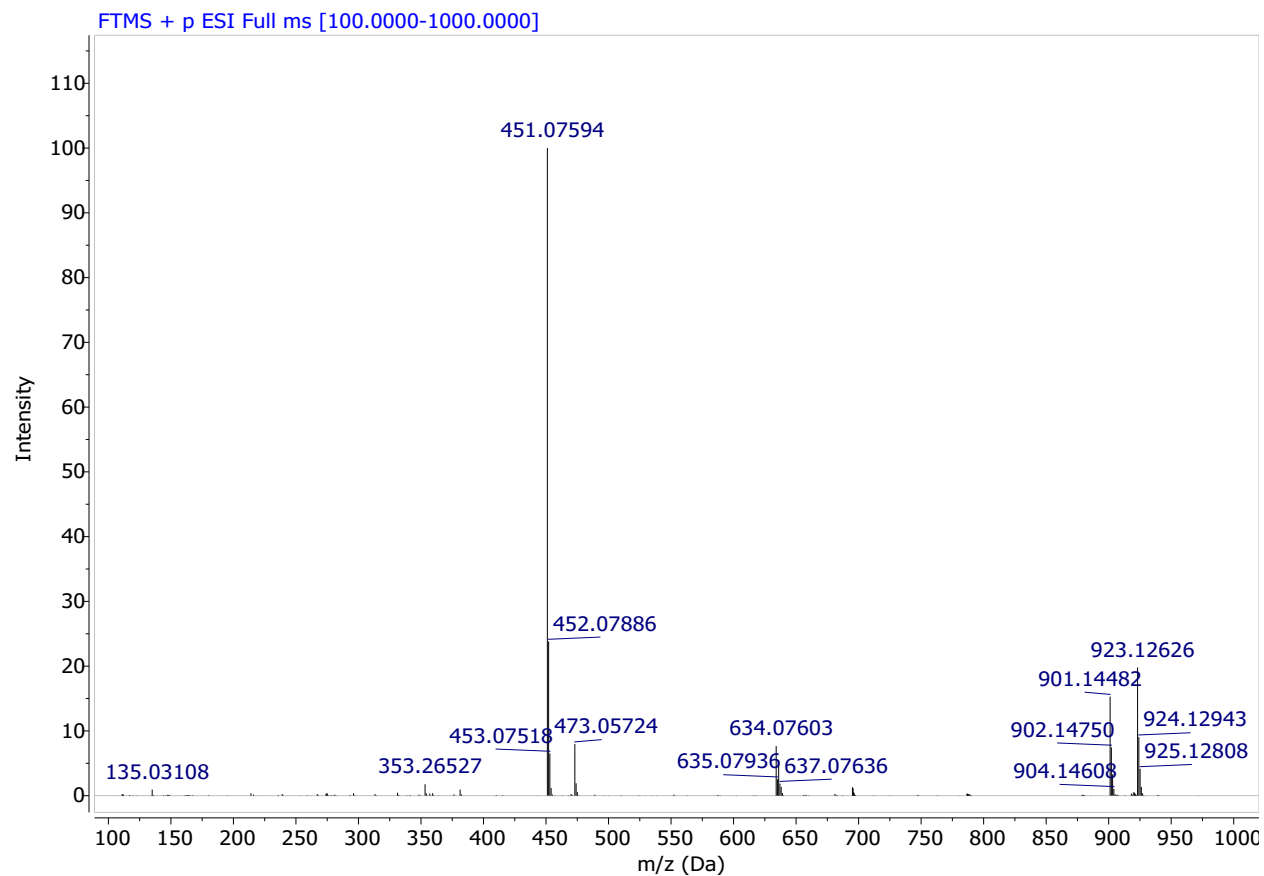

HRMS Spectrum of Compound **5m**

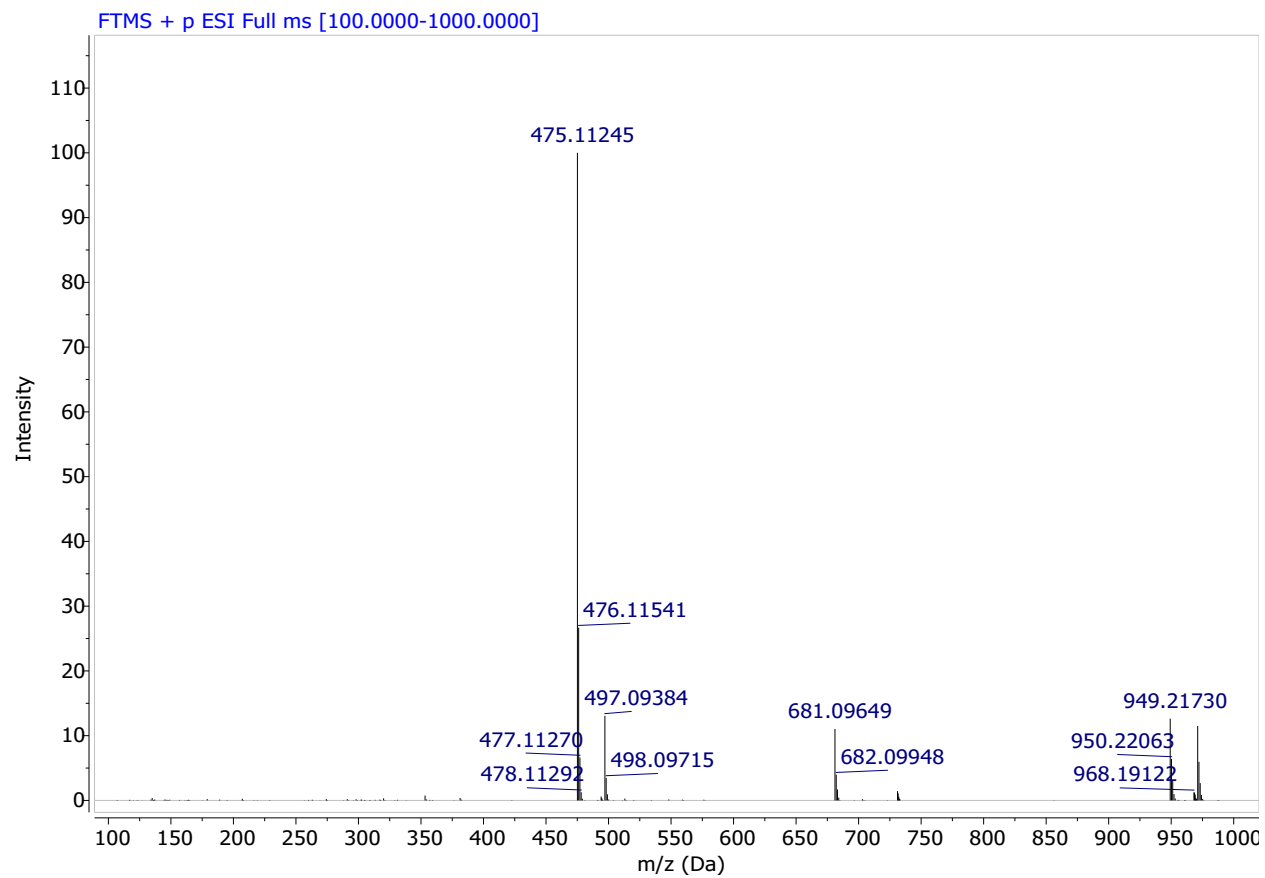

HRMS Spectrum of Compound **5n**

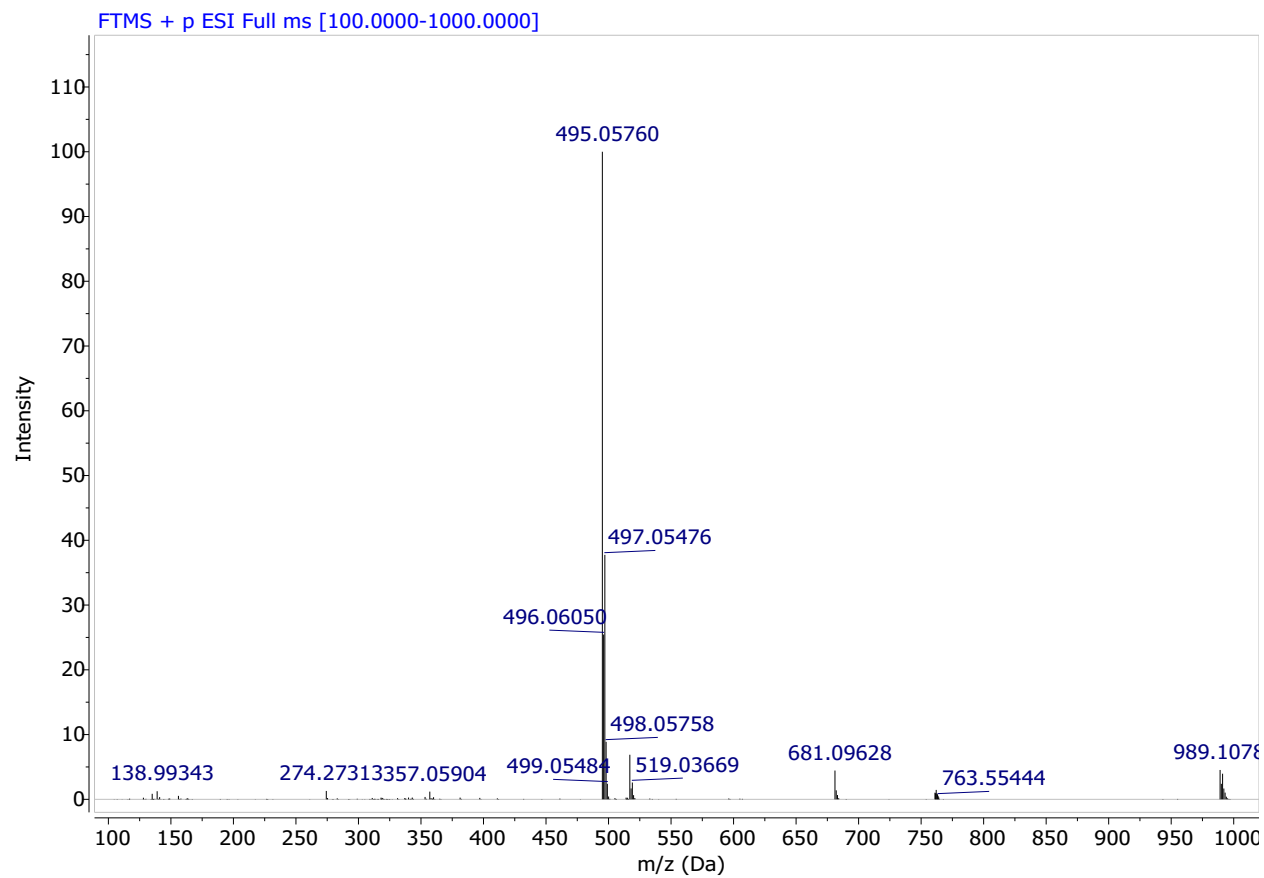

HRMS Spectrum of Compound **5k**

FTMS + p ESI Full ms [100.0000-1000.0000]

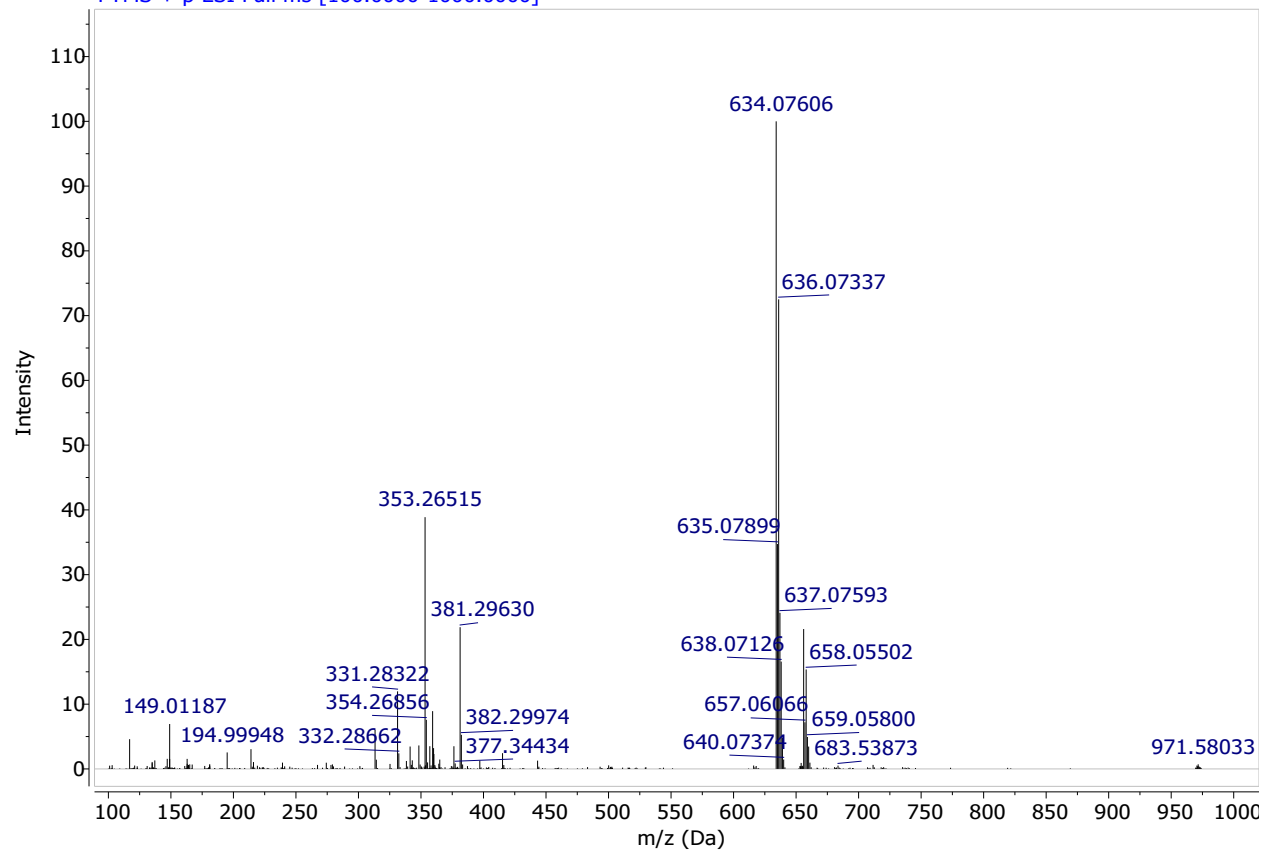

HRMS Spectrum of Compound **5p**
